# Supplementary material for: Chalcone Mannich base derivatives: synthesis, antimalarial activities against Plasmodium knowlesi, and molecular docking analysis
Source: Royal Society of Chemistry journal article supplement (doi:10.1039/d3ra05361j), 2023-01-01

1.  $^1\text{H}$ NMR and  $^{13}\text{C}$ NMR Spectra of compound (*E*)-1-(4-fluorophenyl)-3-(3-hydroxyphenyl)prop-2-en-1-one (**1a**)

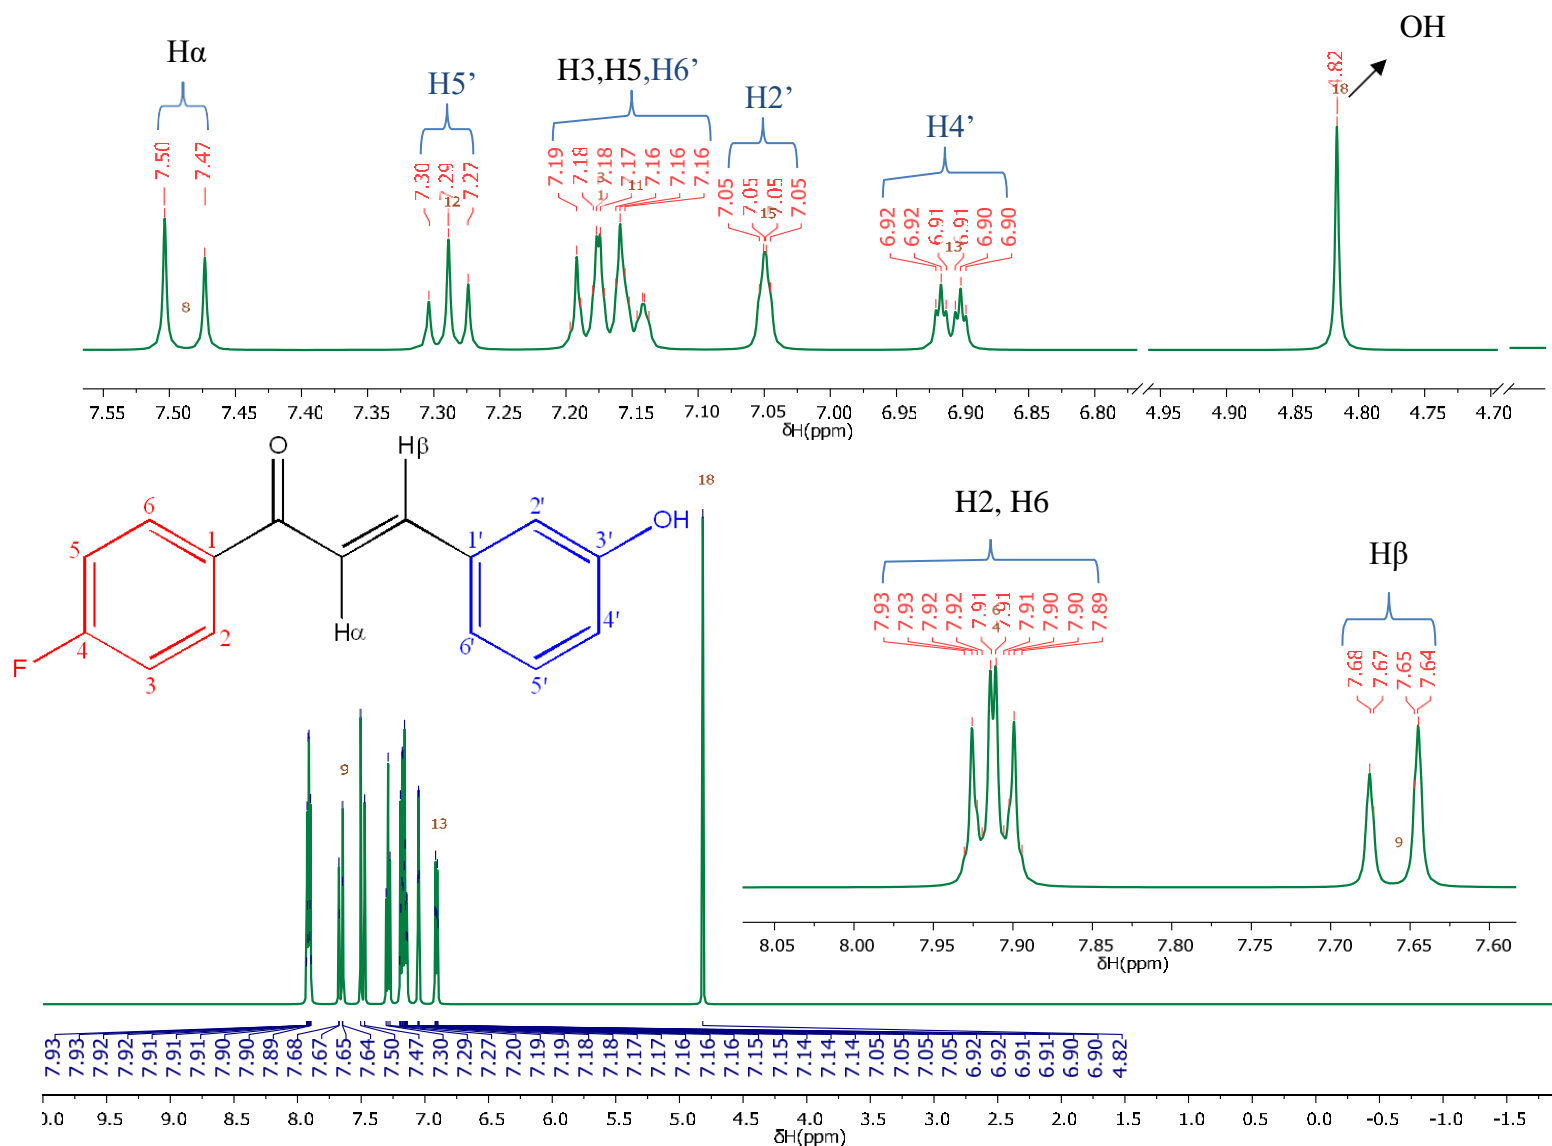

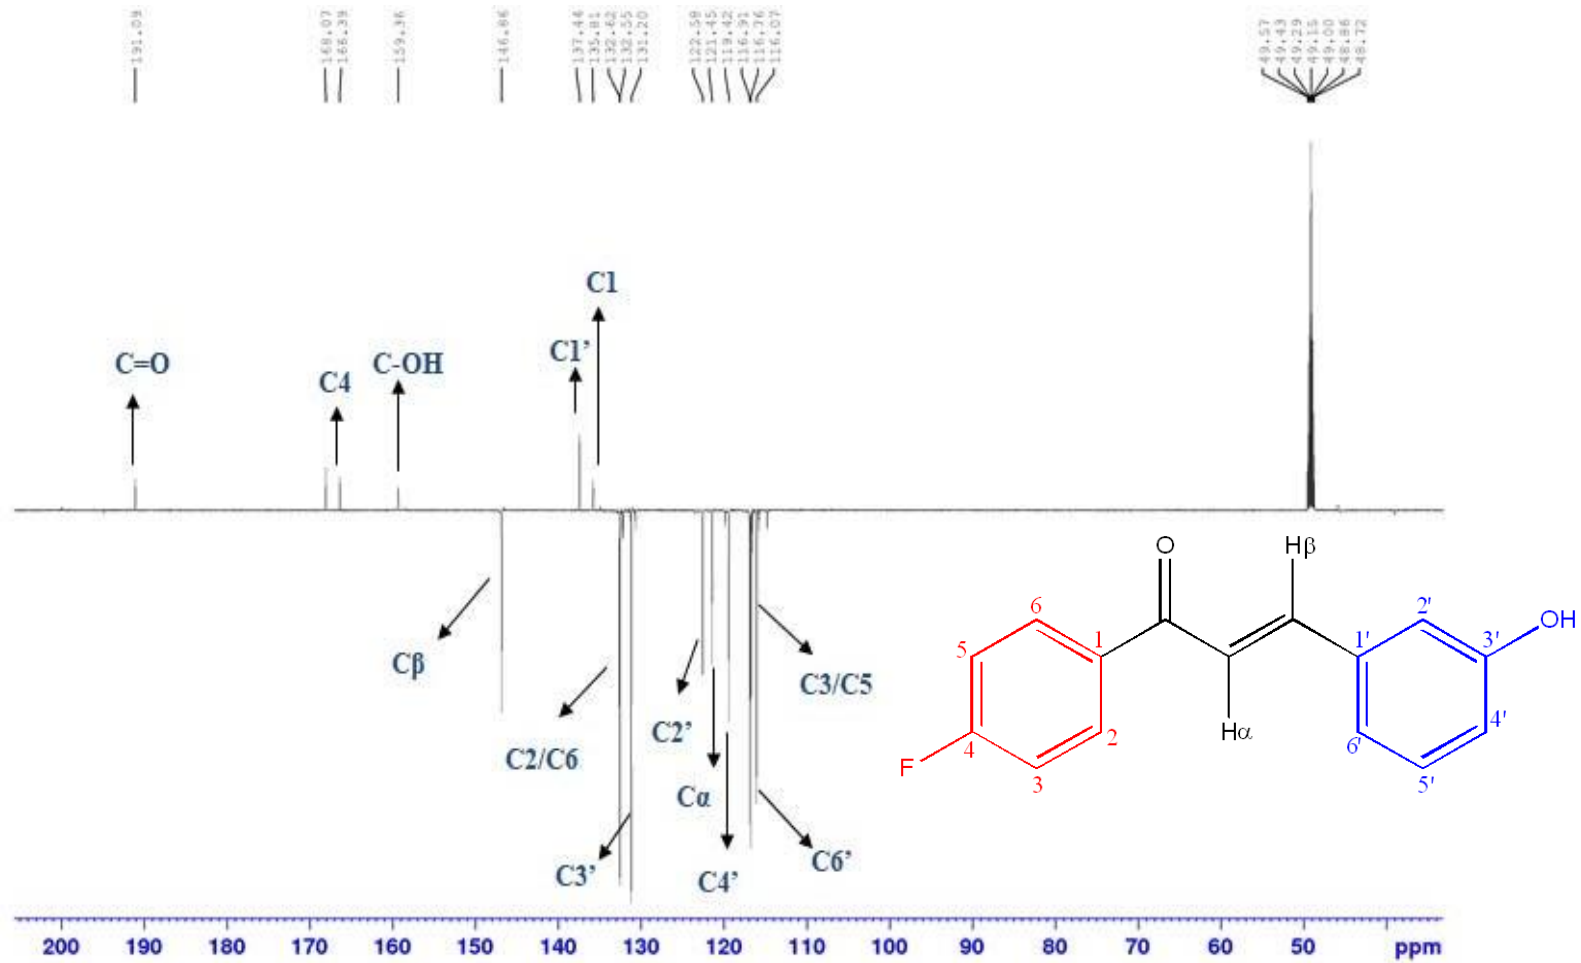

2. <sup>1</sup>HNMR and <sup>13</sup>CNMR Spectra of compound (*E*)-1-(4-fluorophenyl)-3-(4-hydroxyphenyl)prop-2-en-1-one (**1b**)

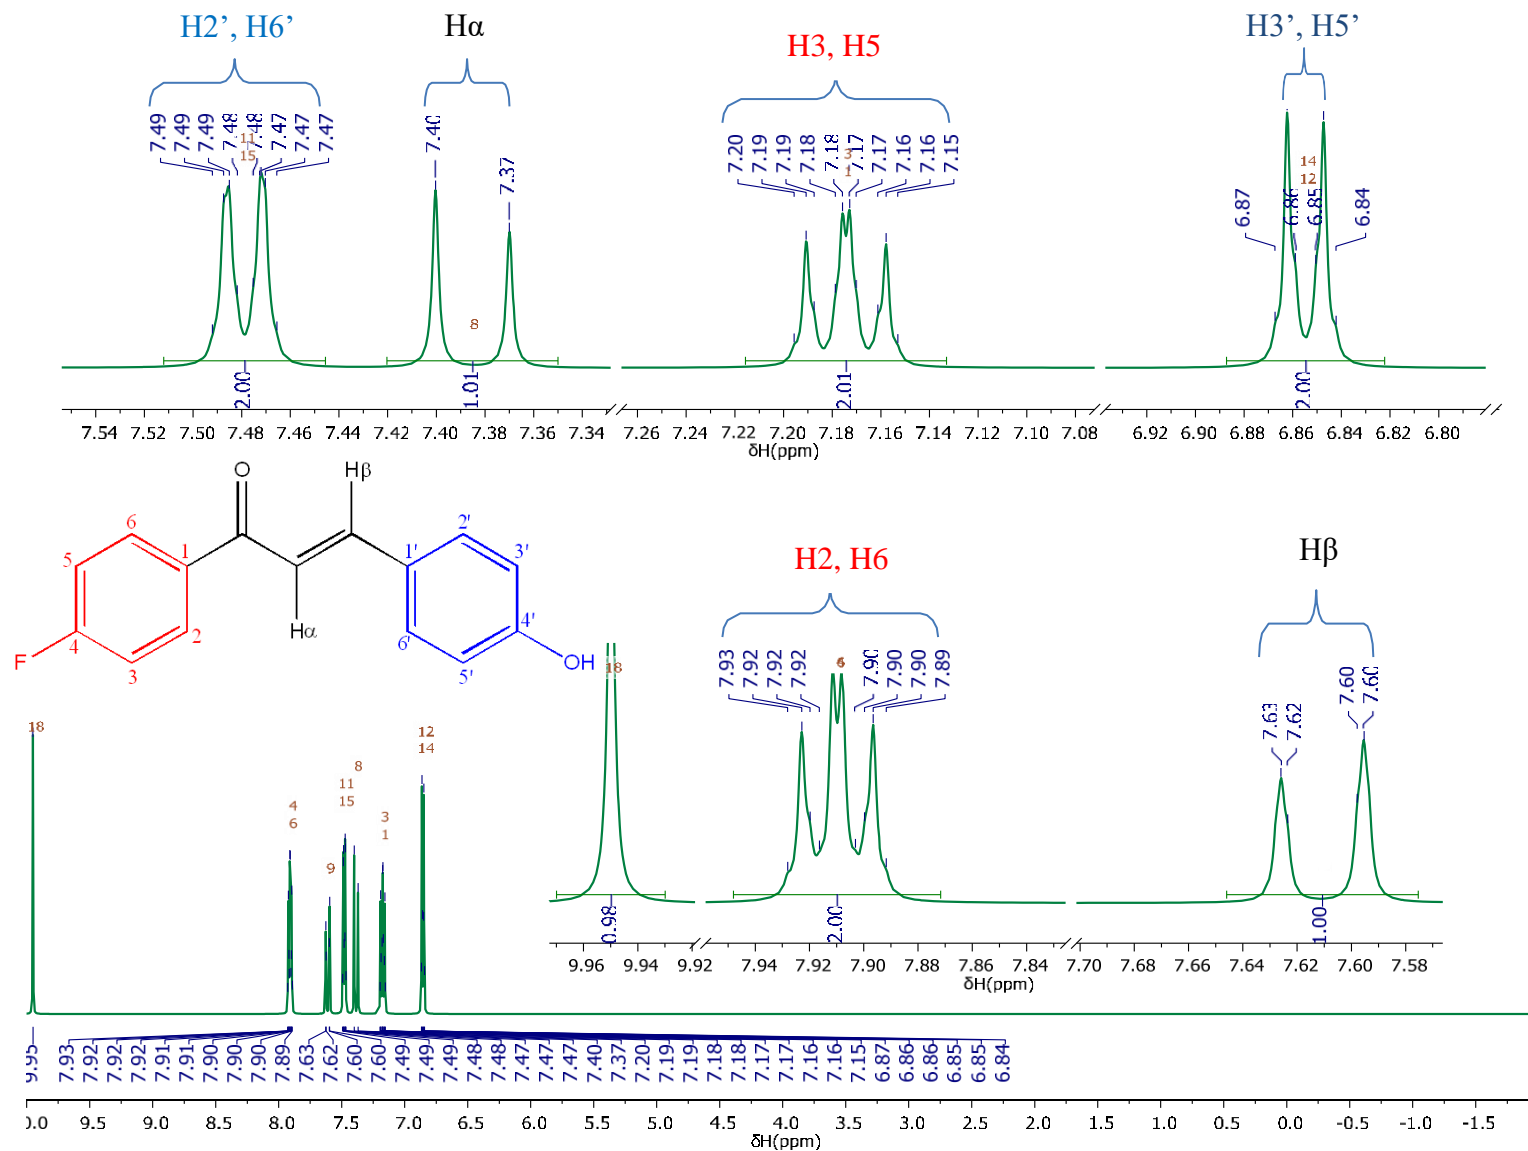

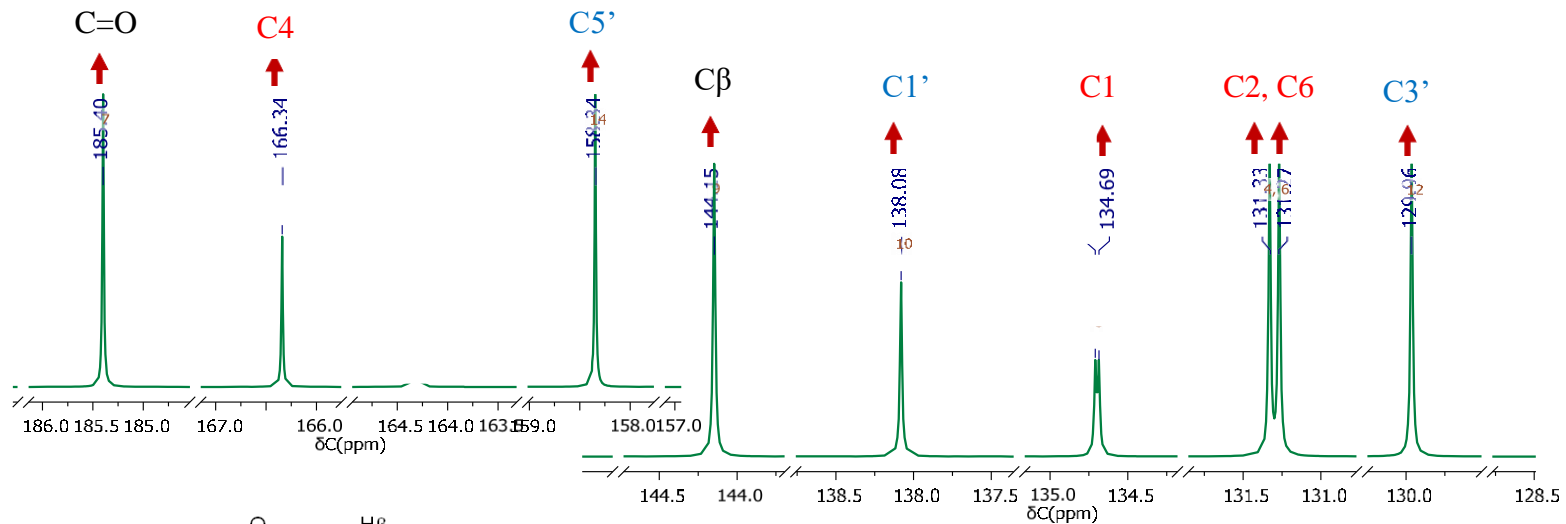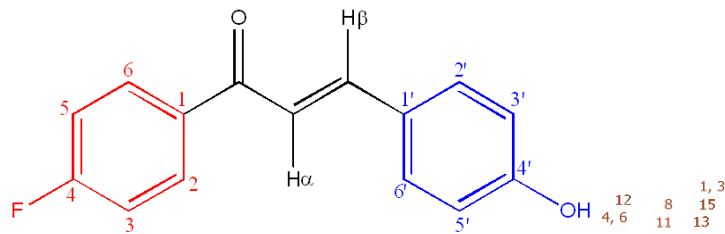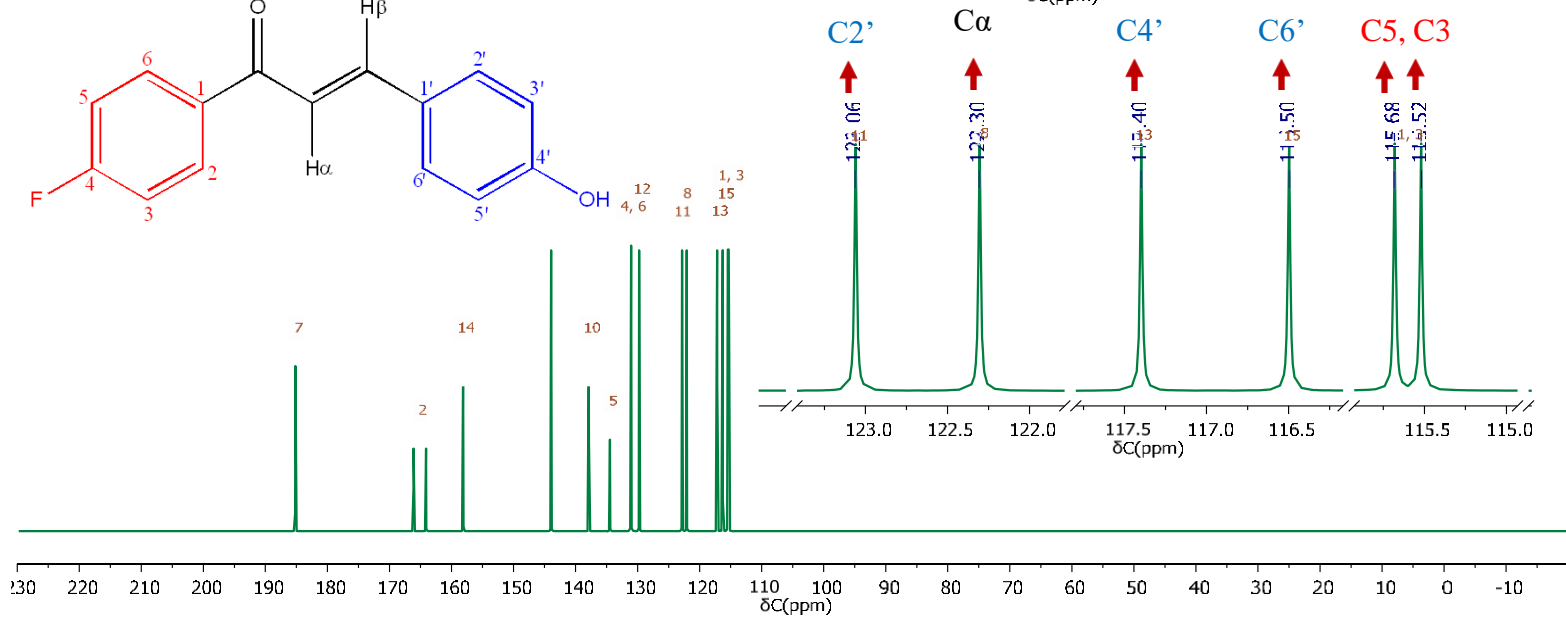

3.  $^1\text{H}$ NMR and  $^{13}\text{C}$ NMR Spectra of compound (*E*)-1-(4-chlorophenyl)-3-(4-hydroxyphenyl)prop-2-en-1-one (**1c**)

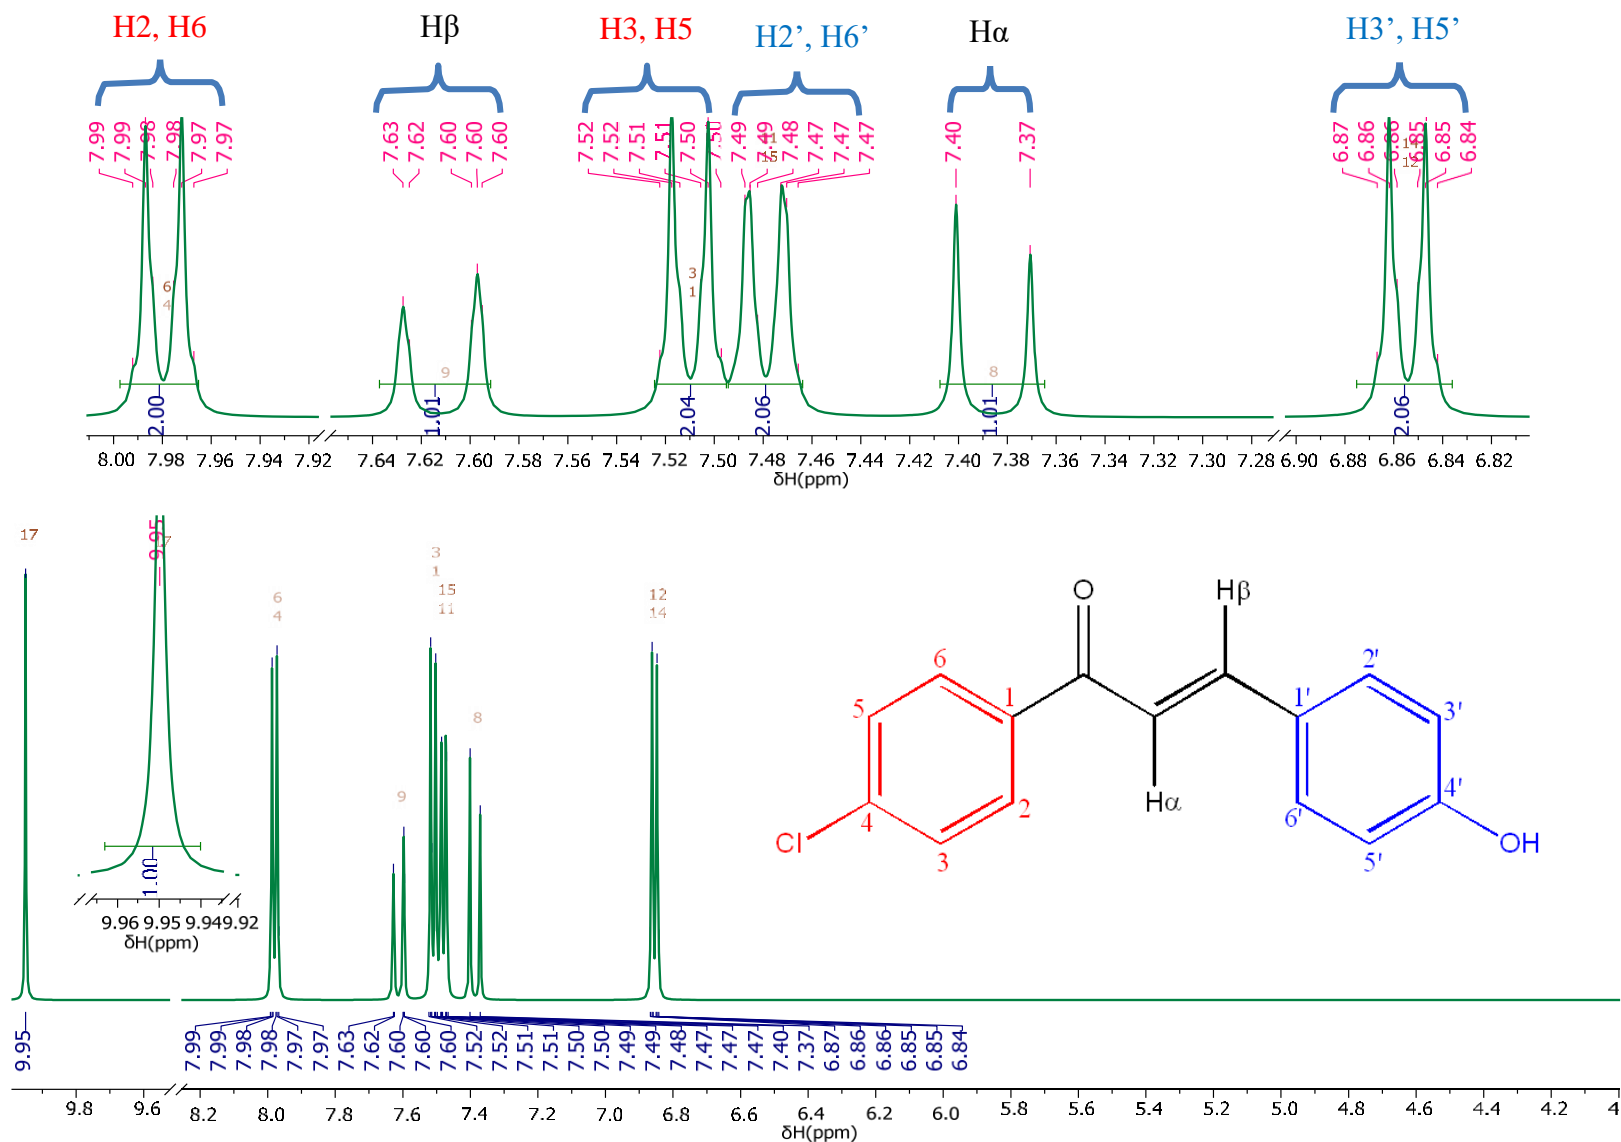

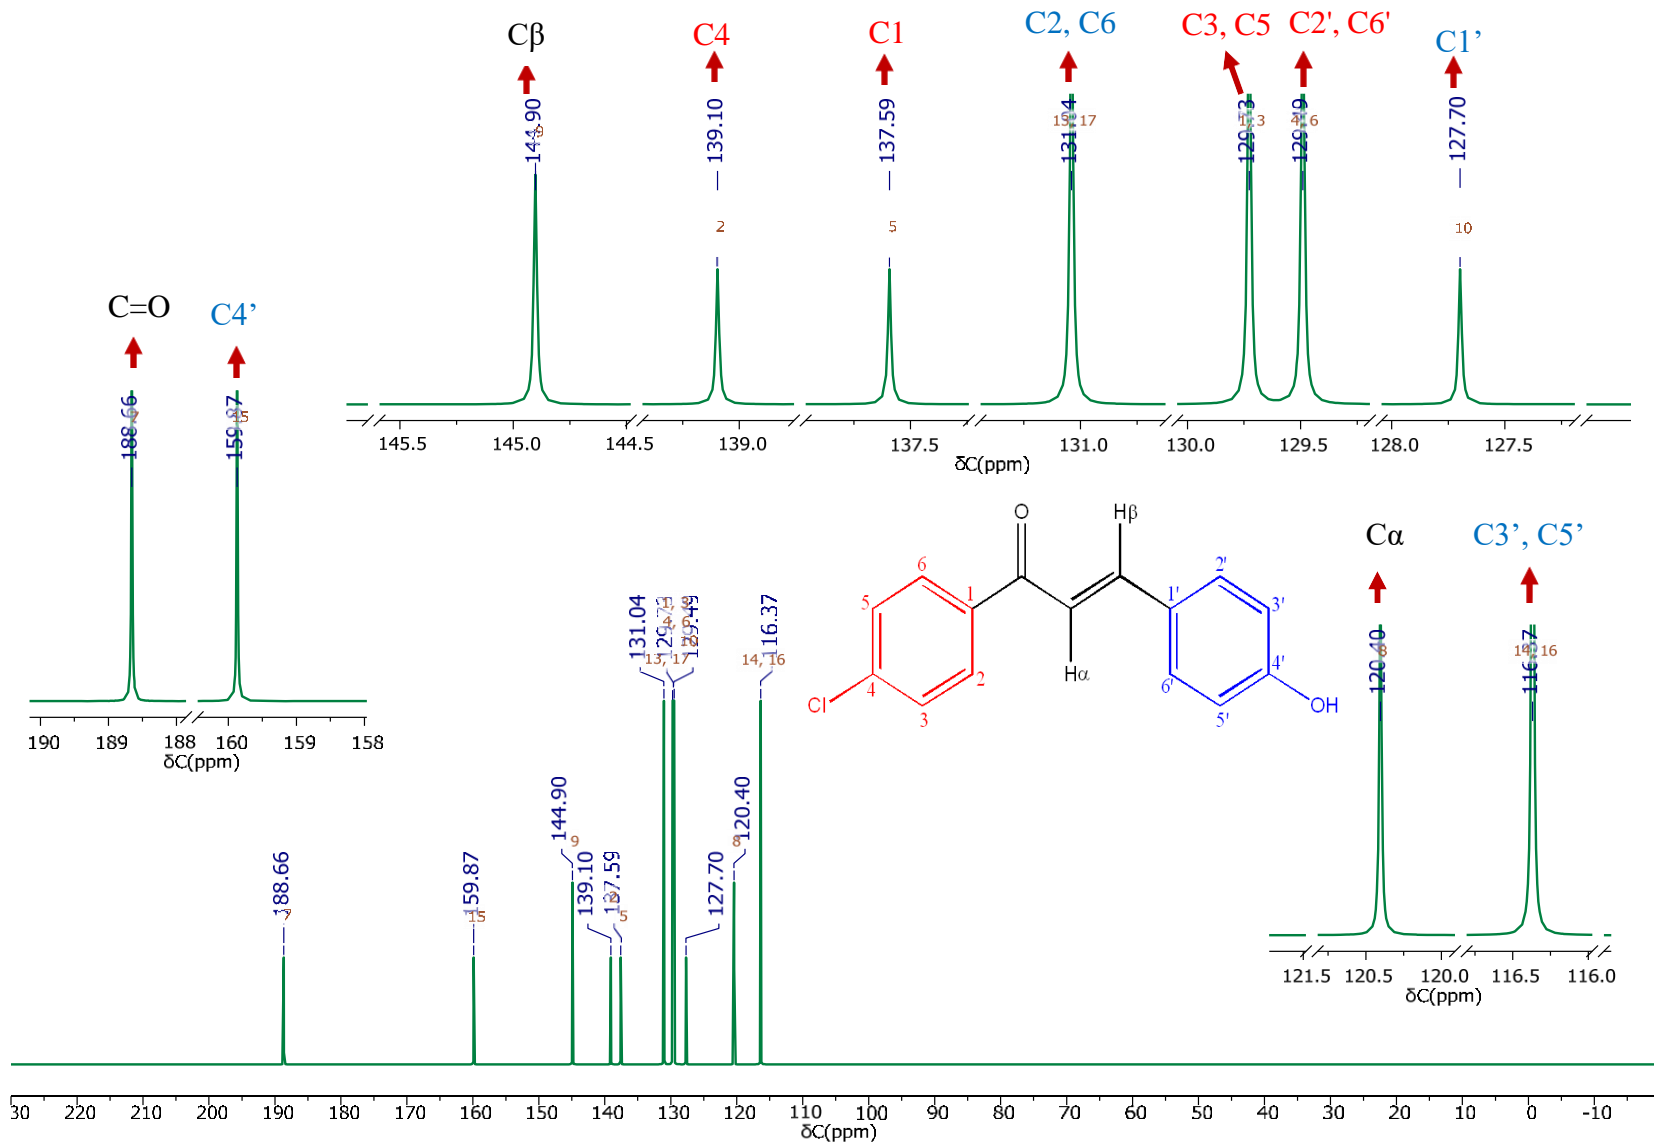

4.  $^1\text{H}$ NMR and  $^{13}\text{C}$ NMR Spectra of compound (*E*)-1-(4-chlorophenyl)-3-(3-hydroxyphenyl) prop-2-en-1-one (**1d**)

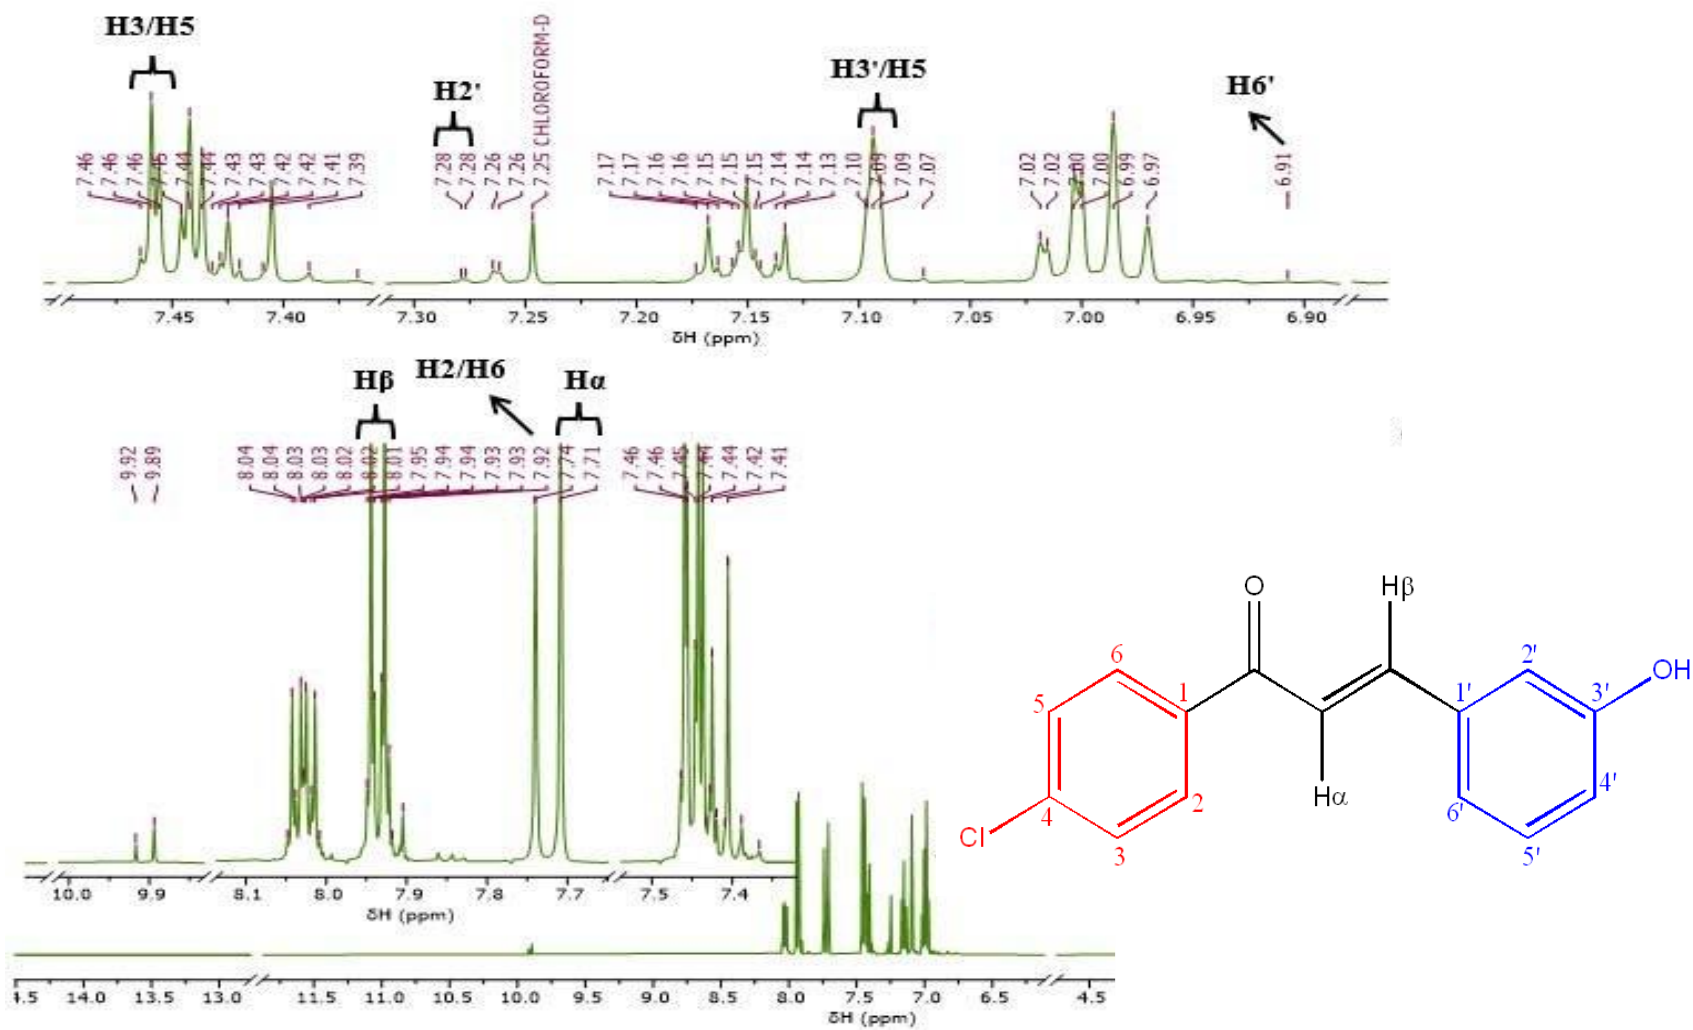

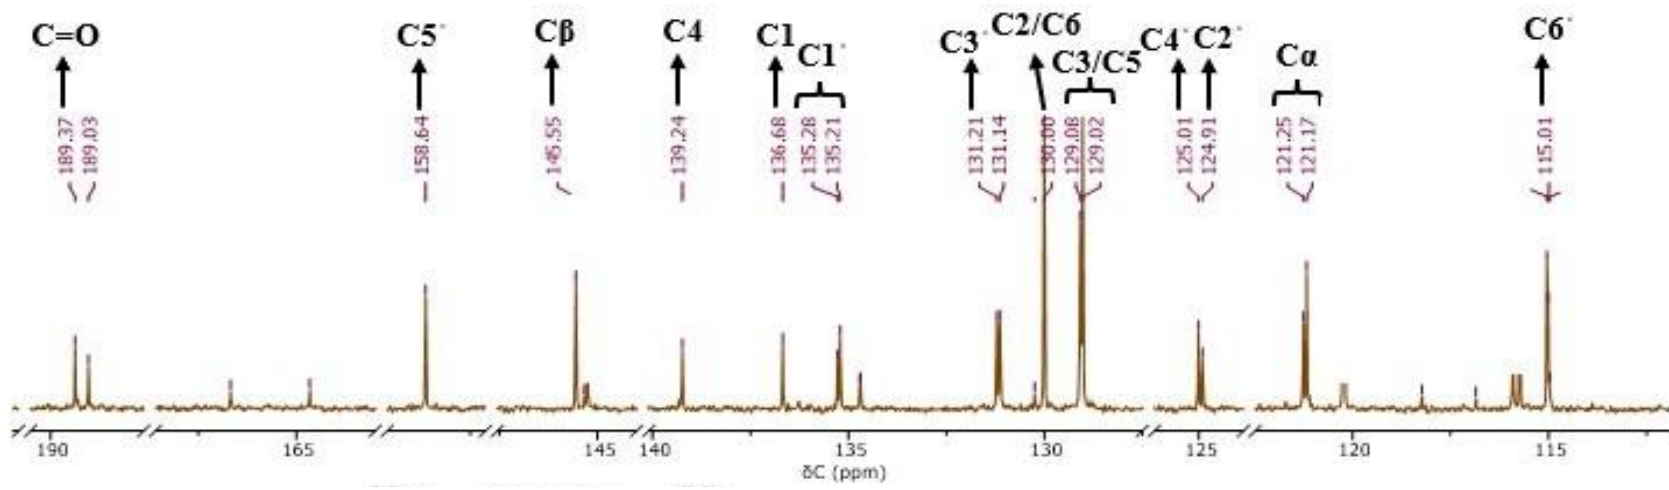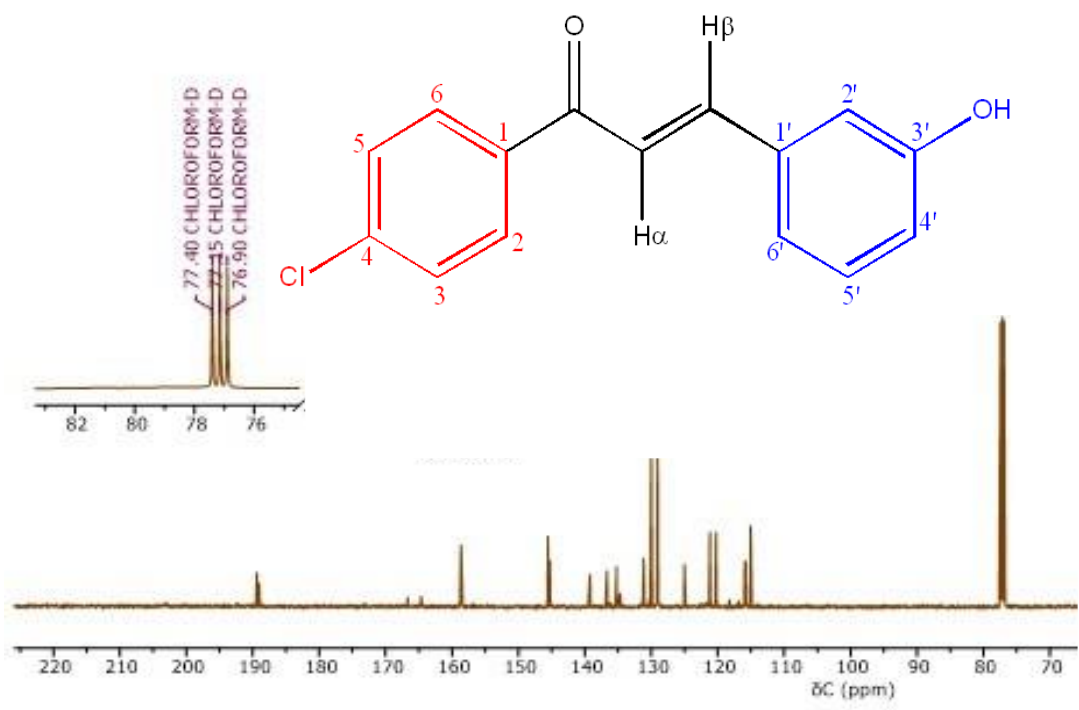



5.  $^1\text{H}$ NMR and  $^{13}\text{C}$ NMR (*E*)-1-(4-fluorophenyl)-3-(3-hydroxy-4-(piperidin-1-ylmethyl)phenyl)prop-2-en-1-one (**2a**)

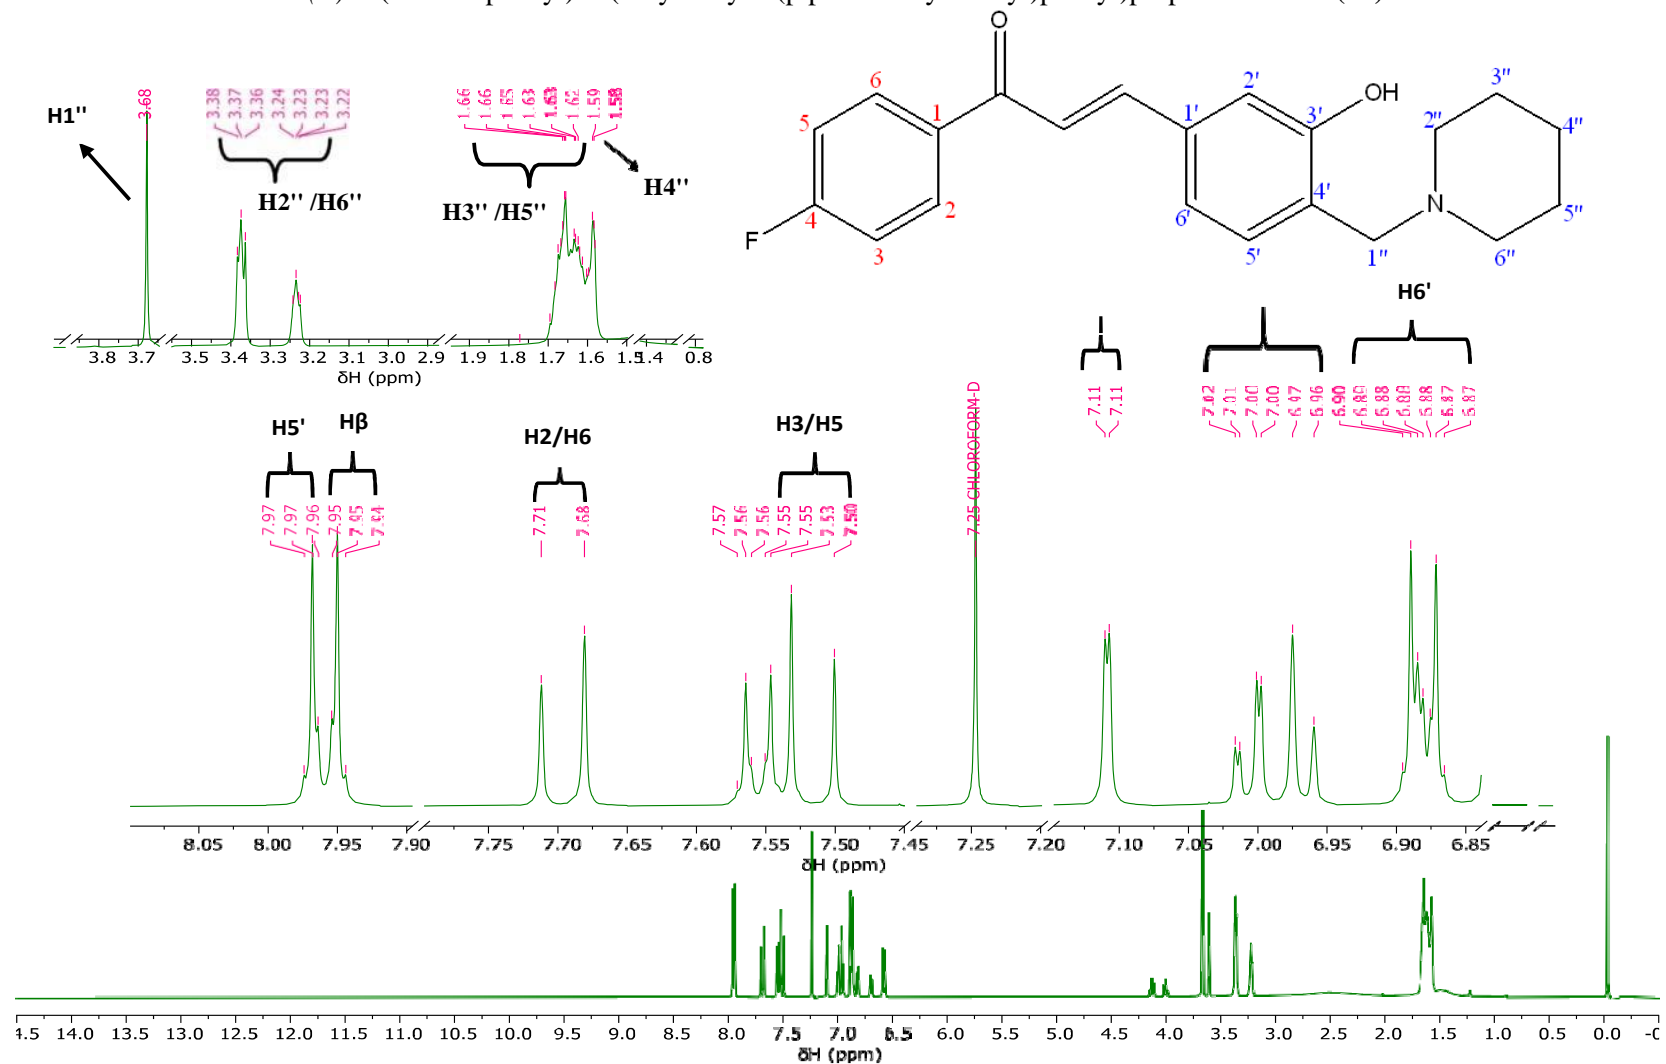

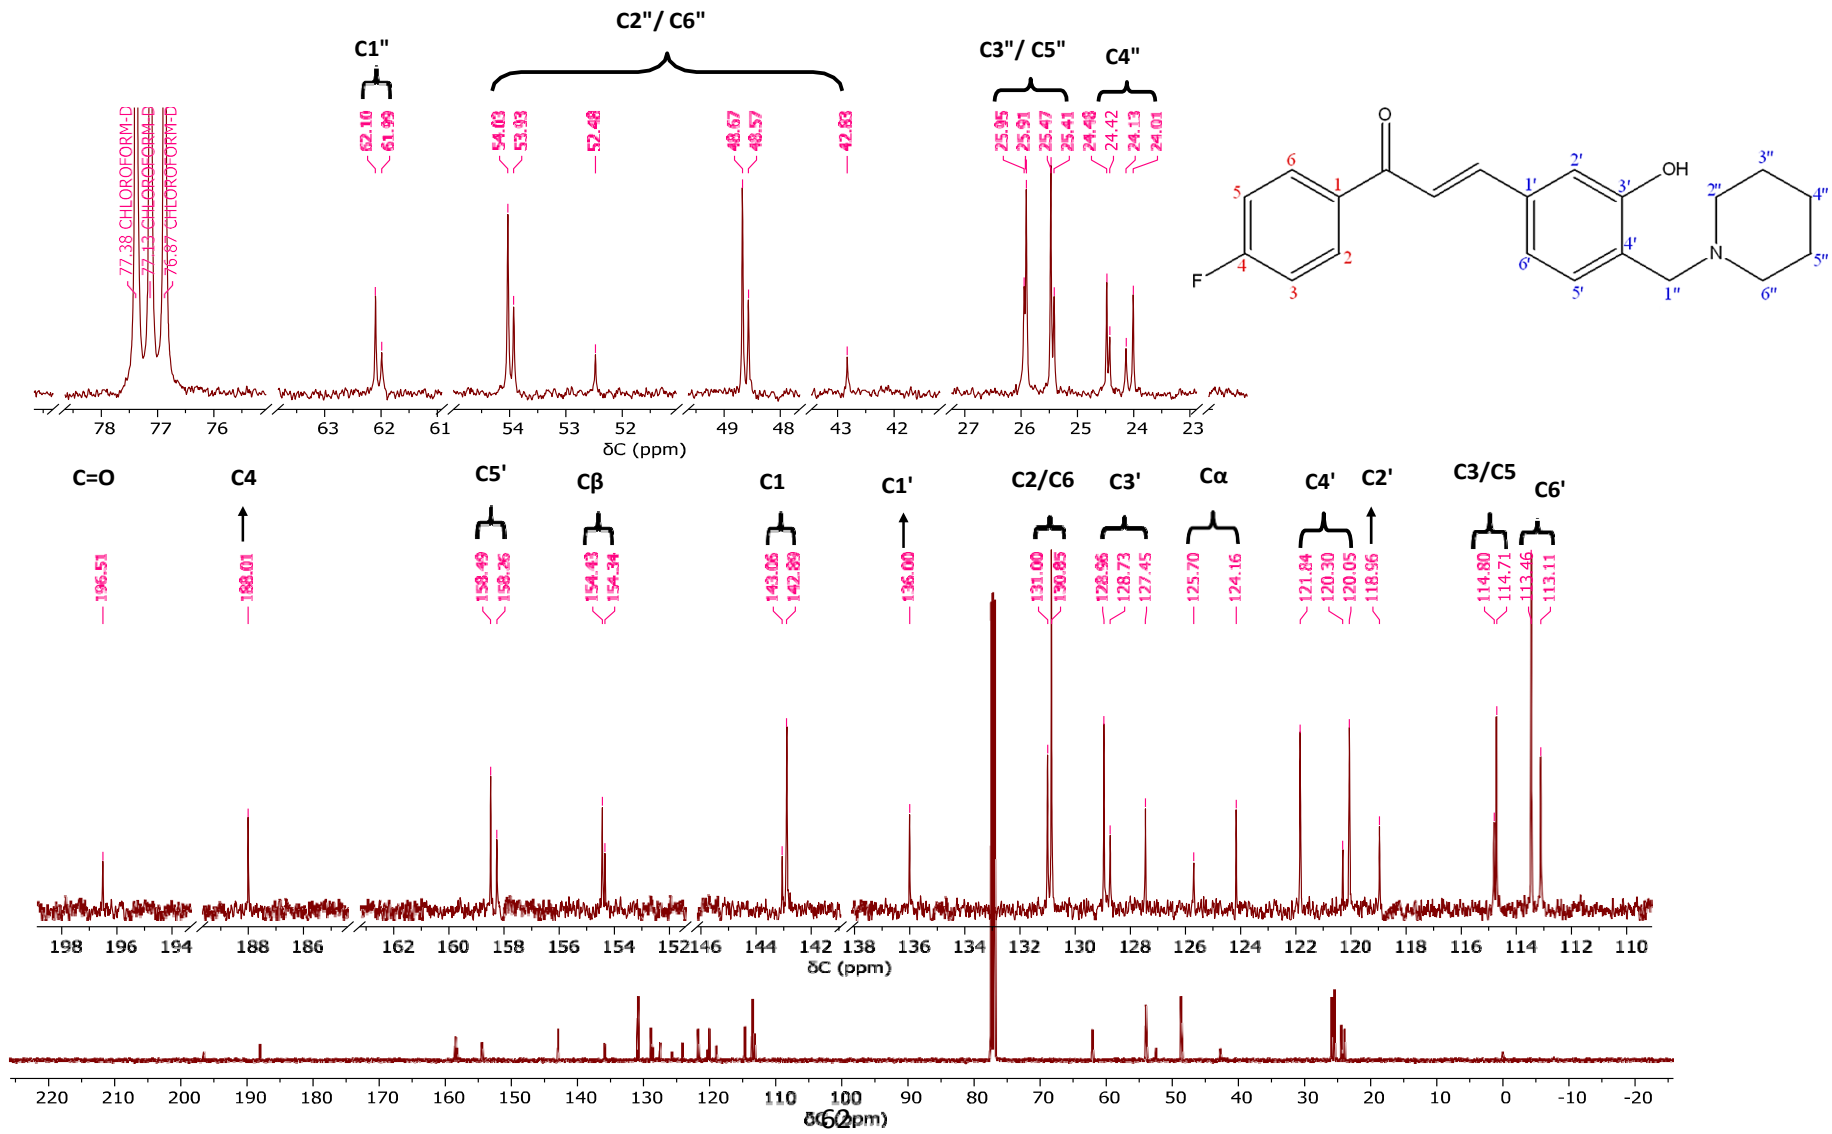

6. <sup>1</sup>HNMR and <sup>13</sup>CNMR Spectra of compound (*E*)-1-(4-fluorophenyl)-3-(4-hydroxy-3-(morpholinomethyl)phenyl)prop-2-en-1-one (**2b**)

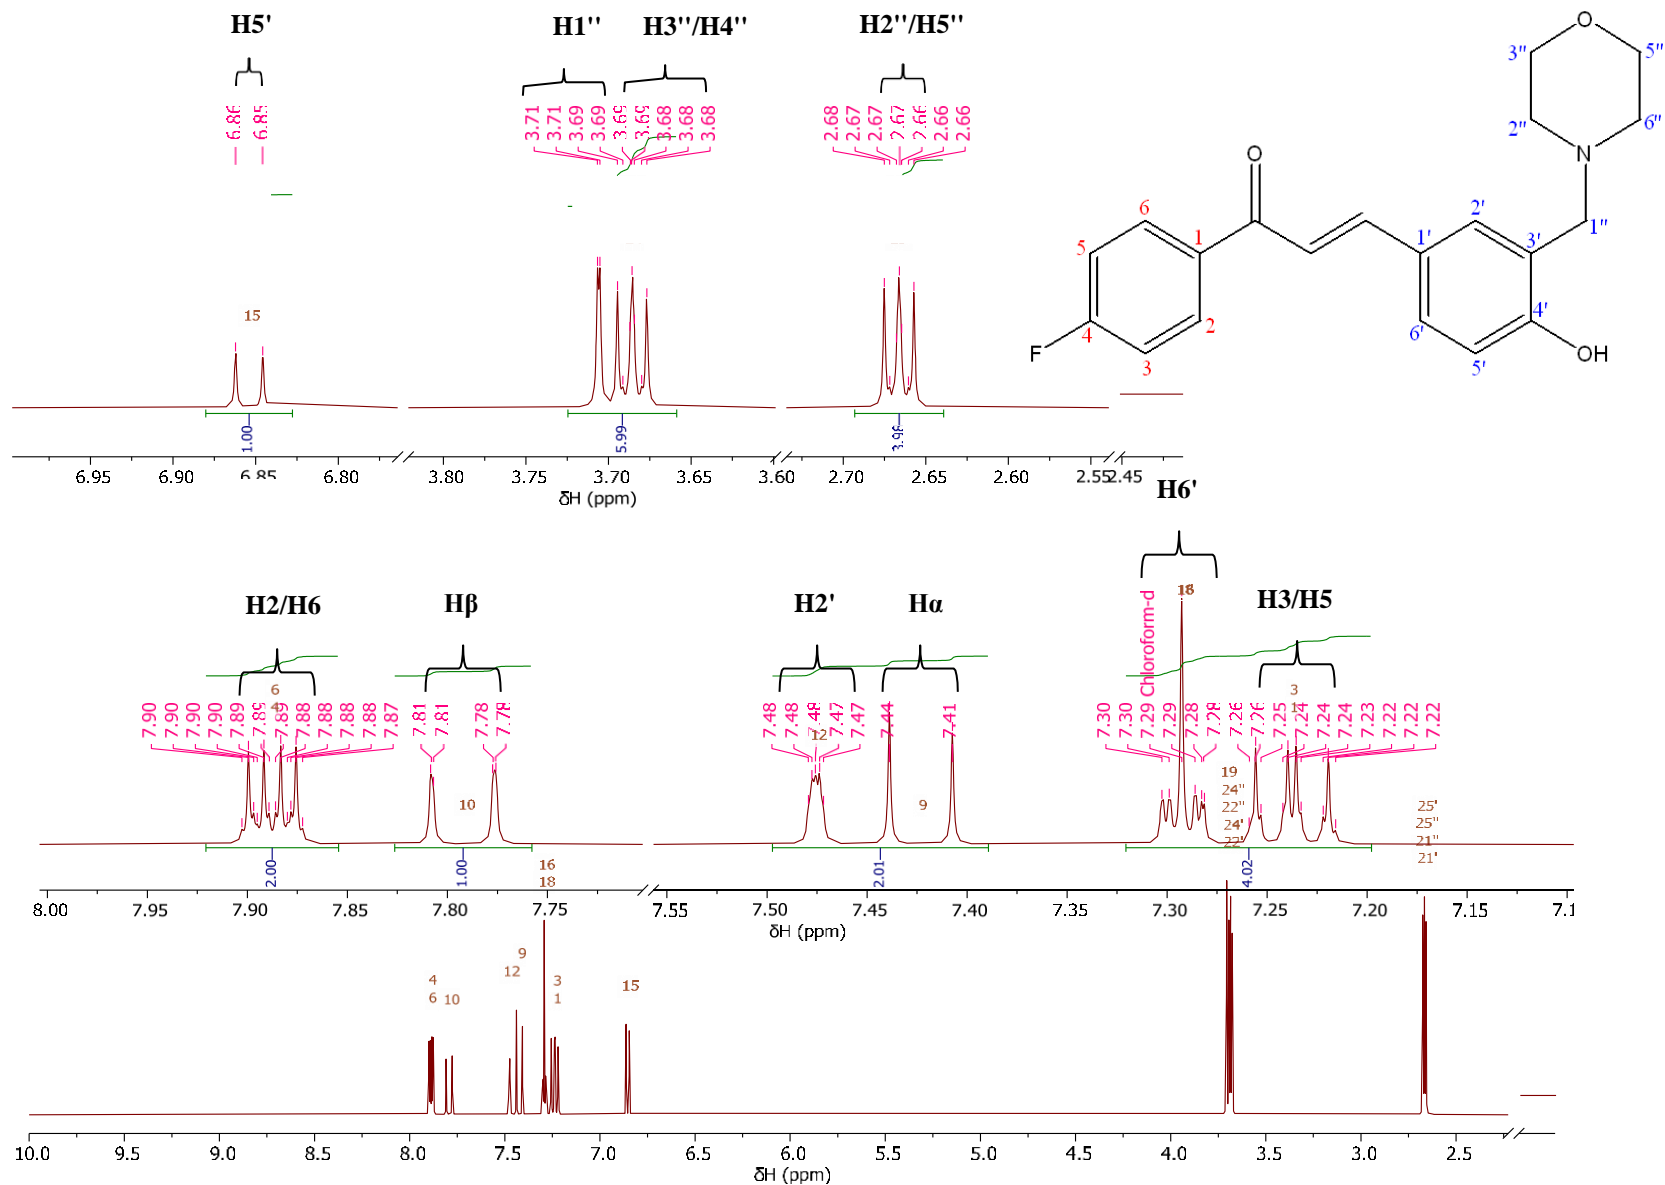

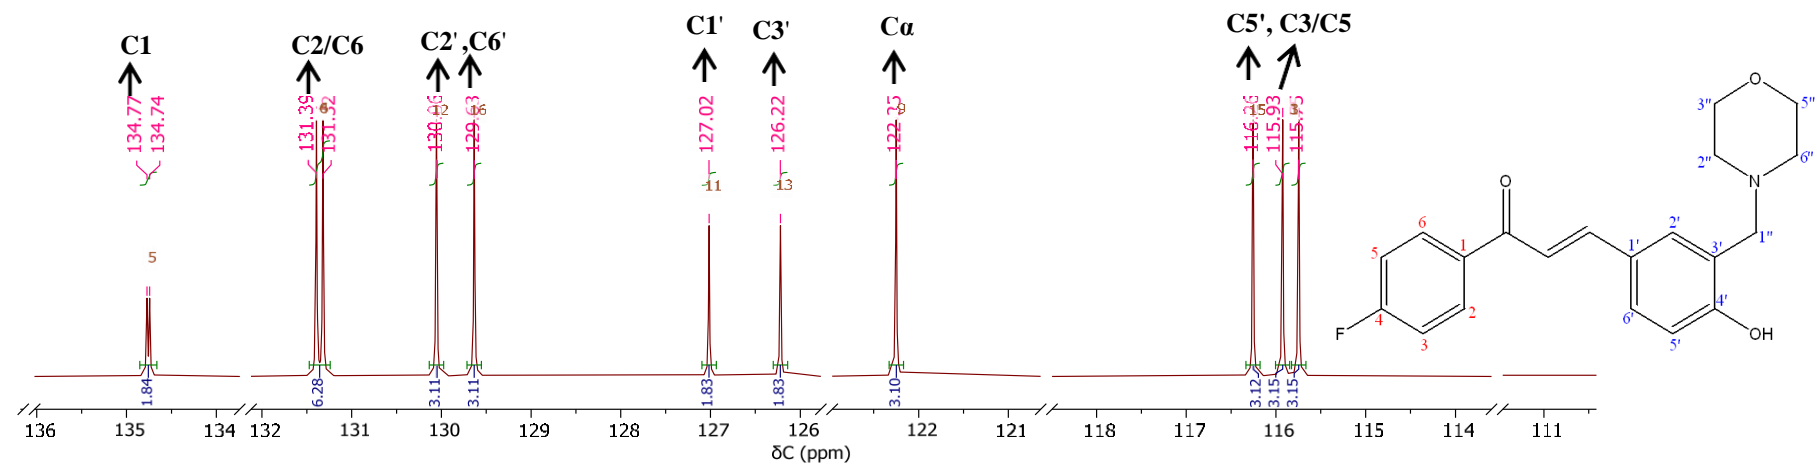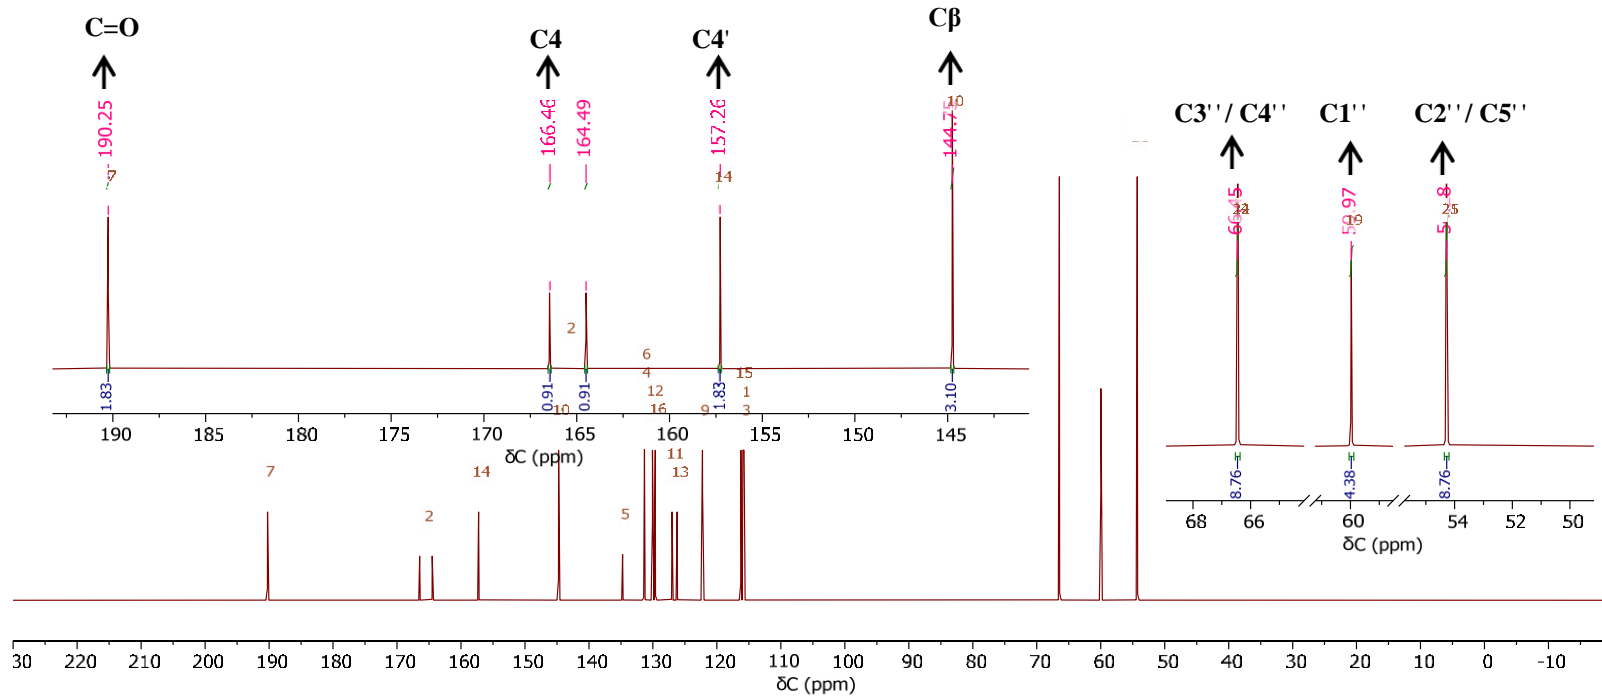

7. <sup>1</sup>HNMR and <sup>13</sup>CNMR of compound (*E*)-1-(4-fluorophenyl)-3-(4-hydroxy-3-(piperidin-1-ylmethyl)phenyl)prop-2-en-1-one (**2c**)

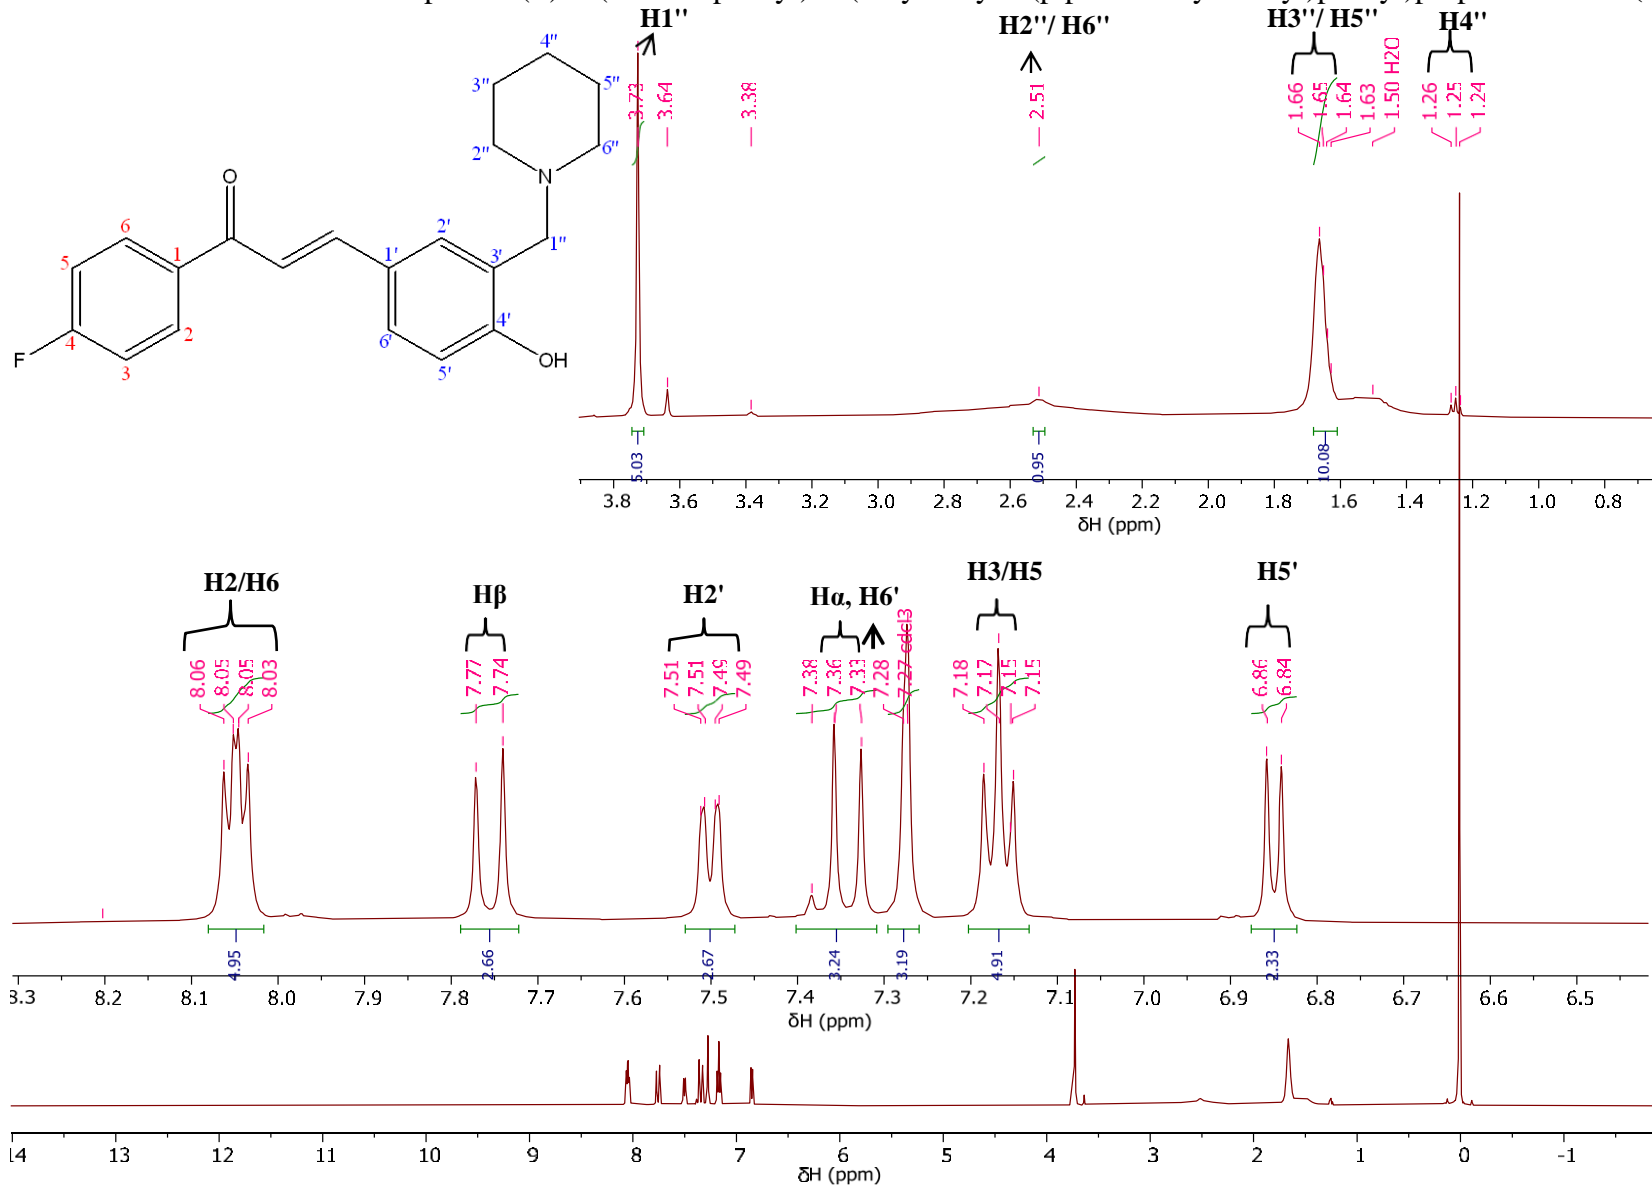

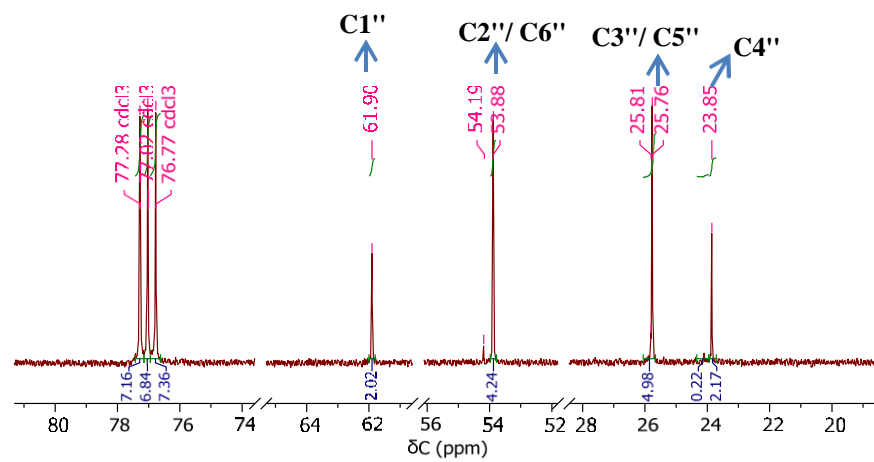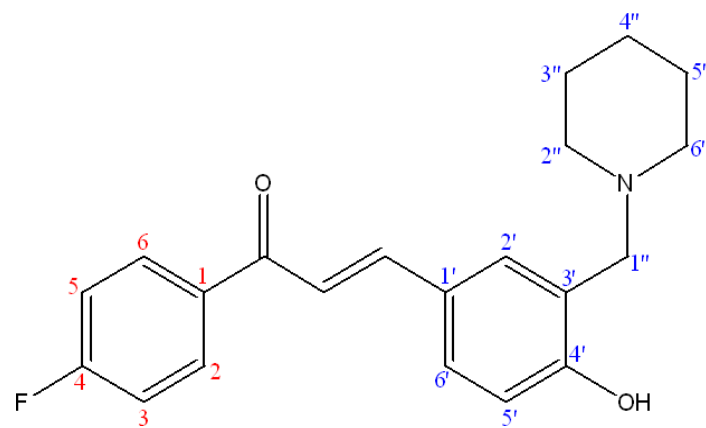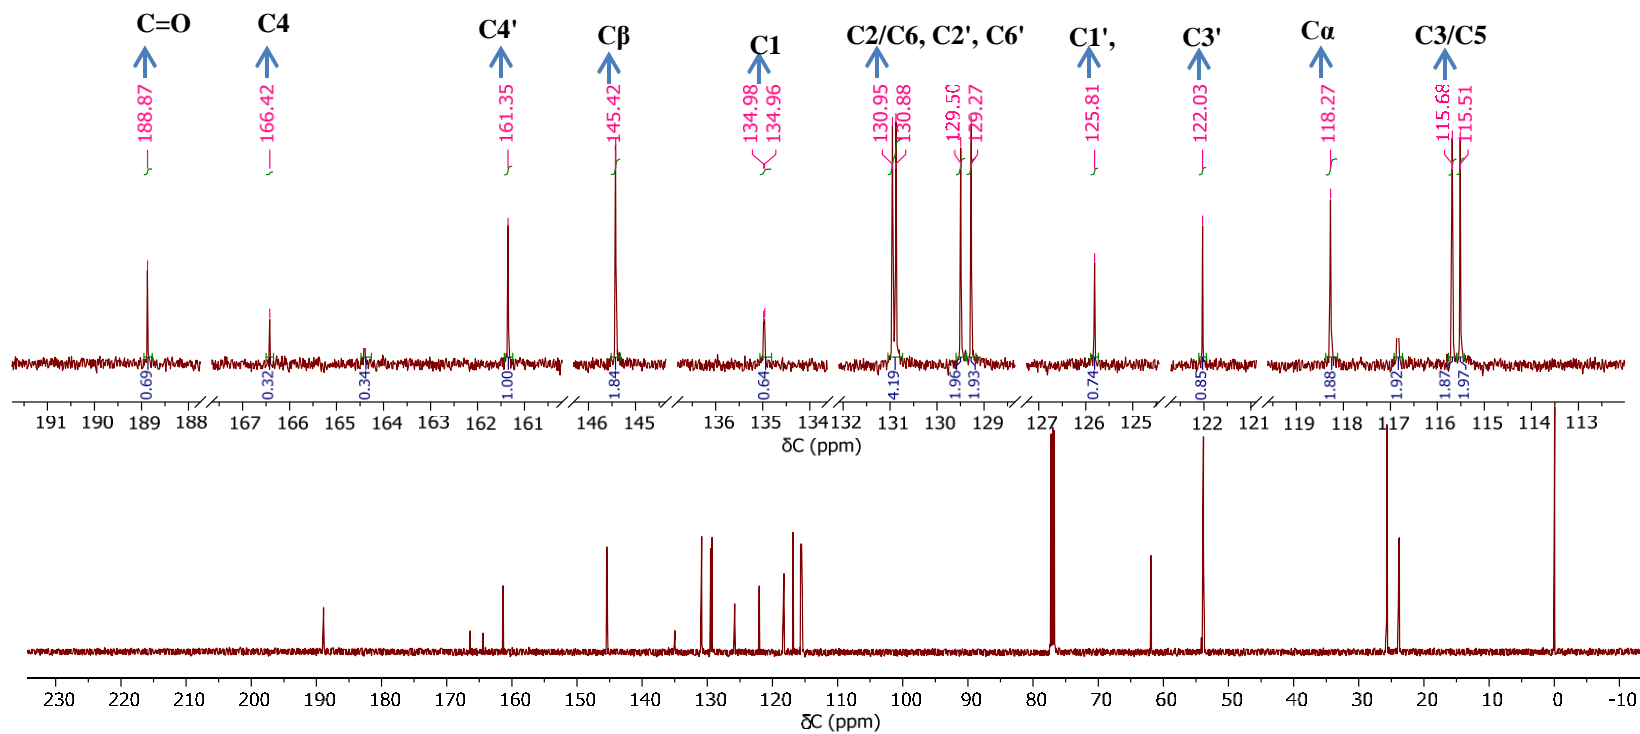

8.  $^1\text{H}$ NMR and  $^{13}\text{C}$ NMR of compound (*E*)-1-(4-fluorophenyl)-3-(4-hydroxy-3-(4-methylpiperidin-1-yl)methyl)phenylprop-2-en-1-one (**2d**)

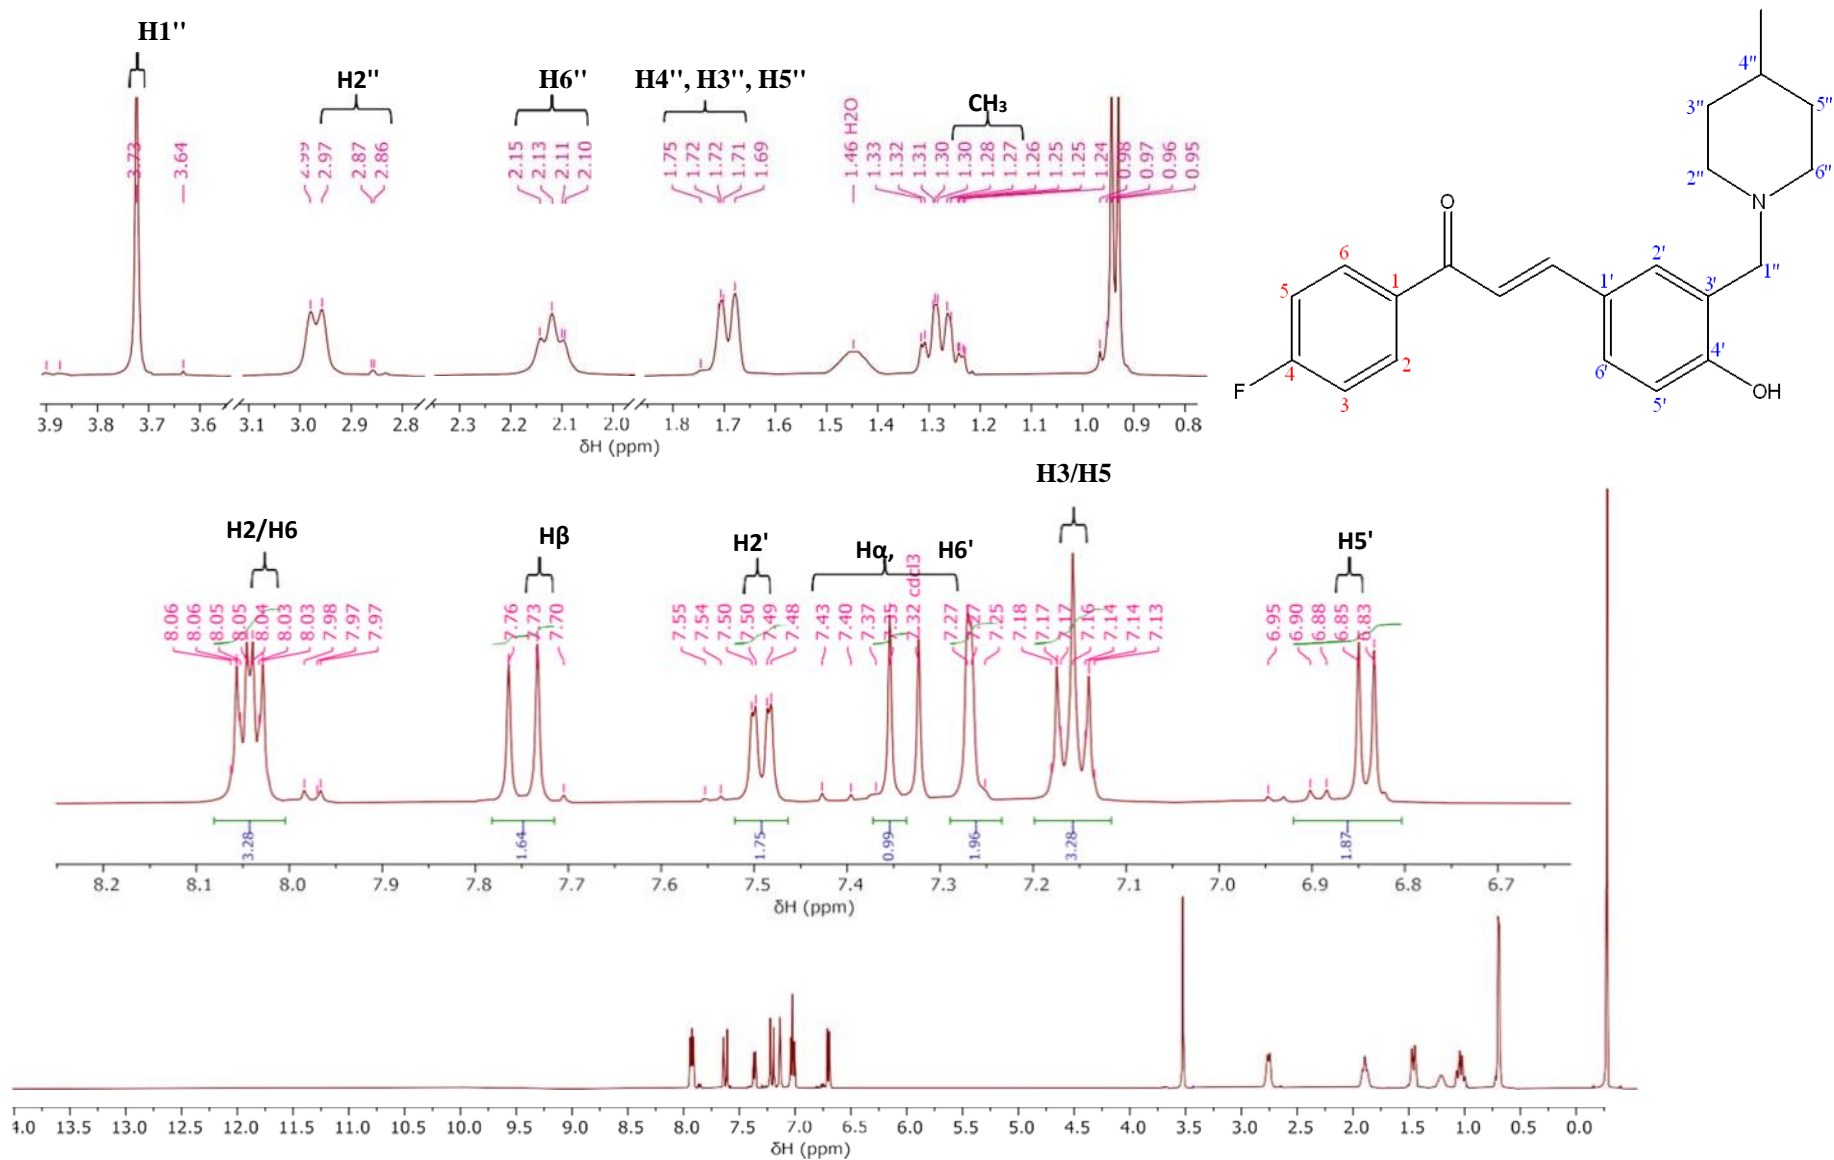

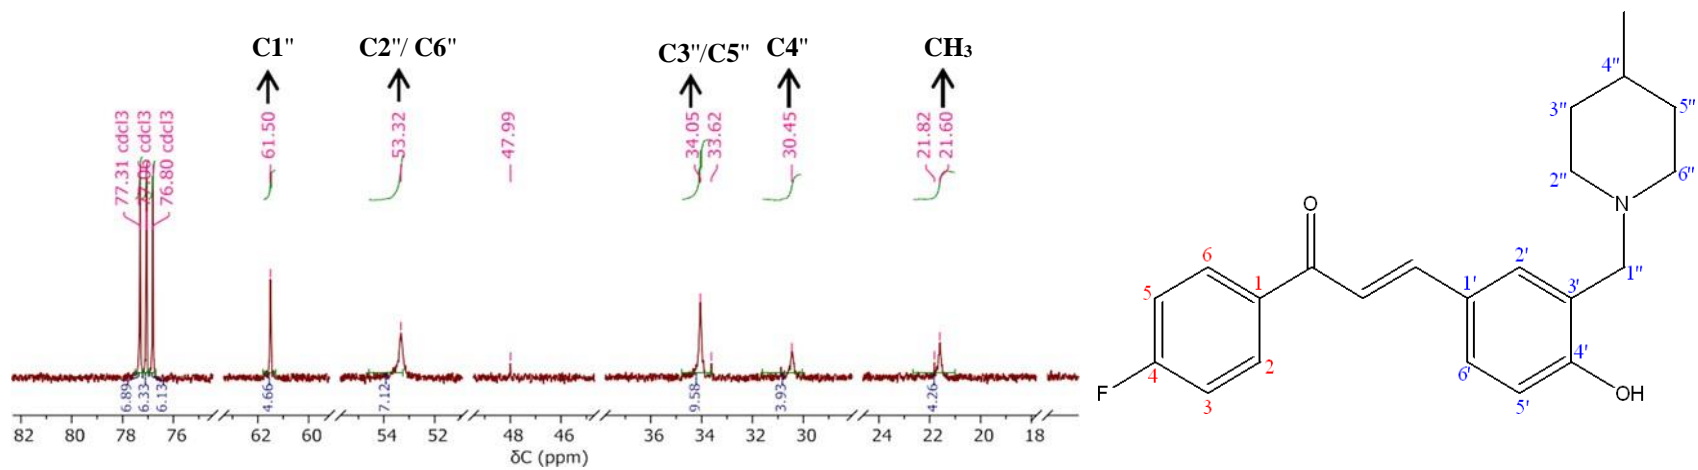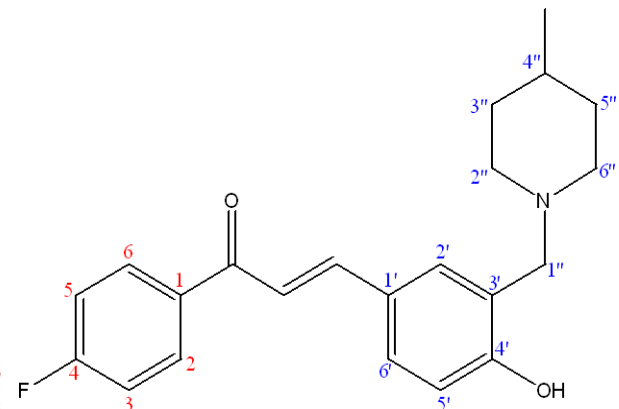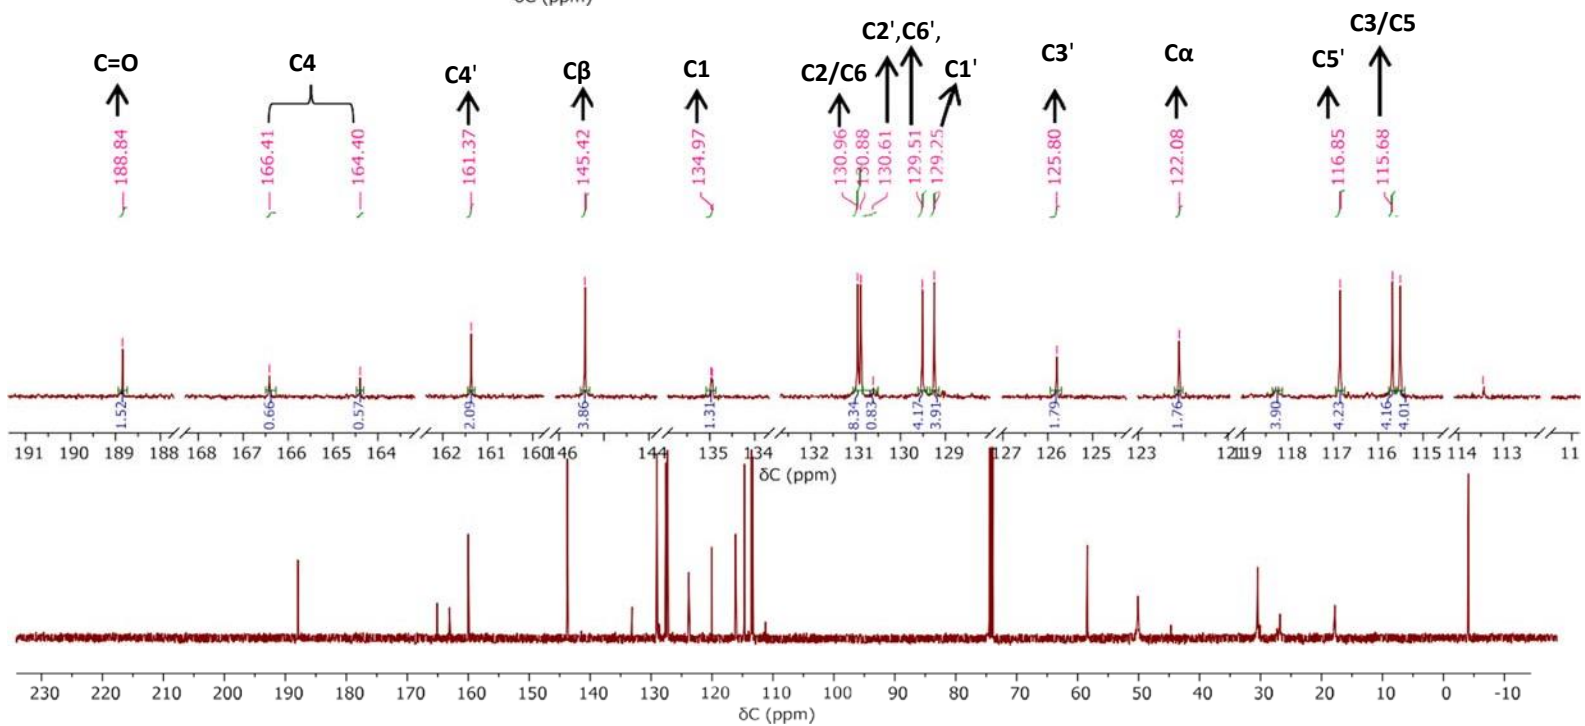



9.  $^1\text{H}$ NMR and  $^{13}\text{C}$ NMR (*E*)-1-(4-chlorophenyl)-3-(3-dimethylamino)-4-hydroxyphenylprop-2-en-1-one (**2e**)

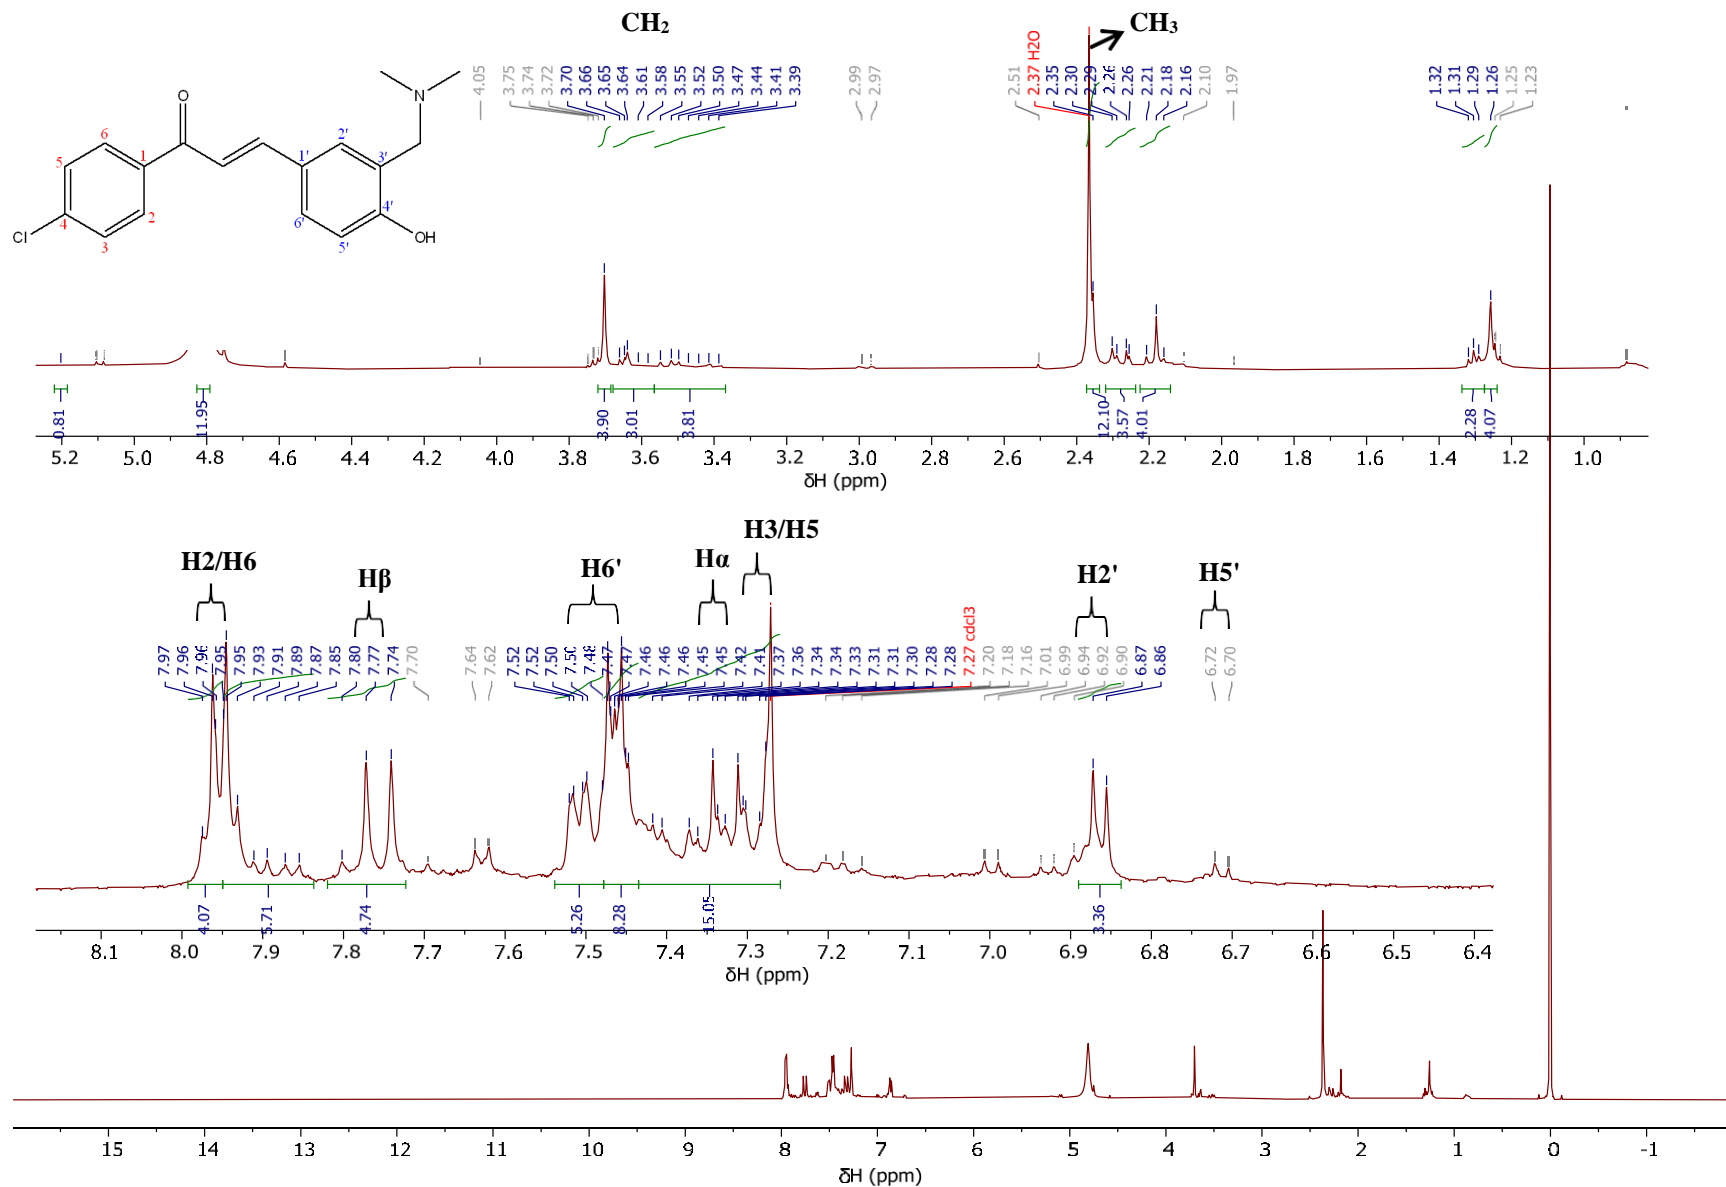

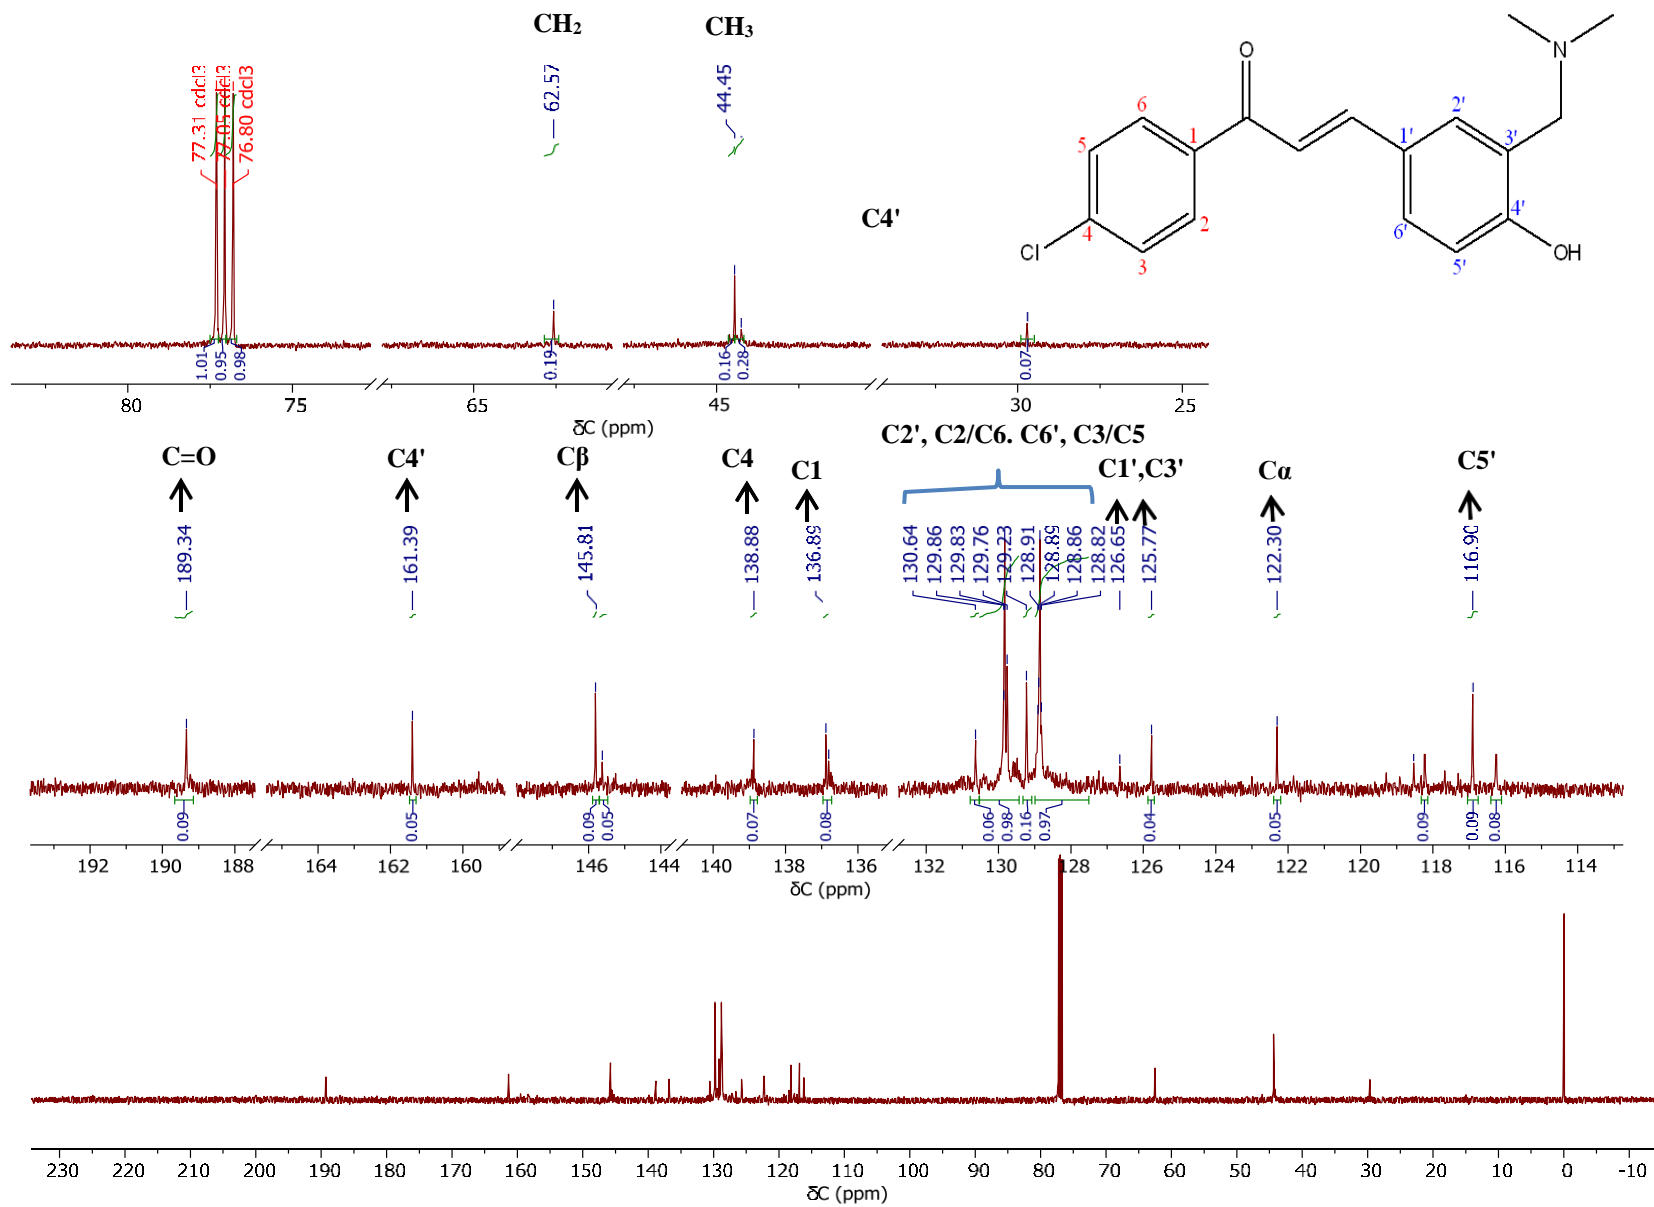

10.  $^1\text{H}$ NMR &  $^{13}\text{C}$ NMR of compound (*E*)-1-(4-chlorophenyl)-3-(4-hydroxy-3-(4-methylpiperidin-1-yl)methyl)phenyl)prop-2-en-1-one (**2f**)

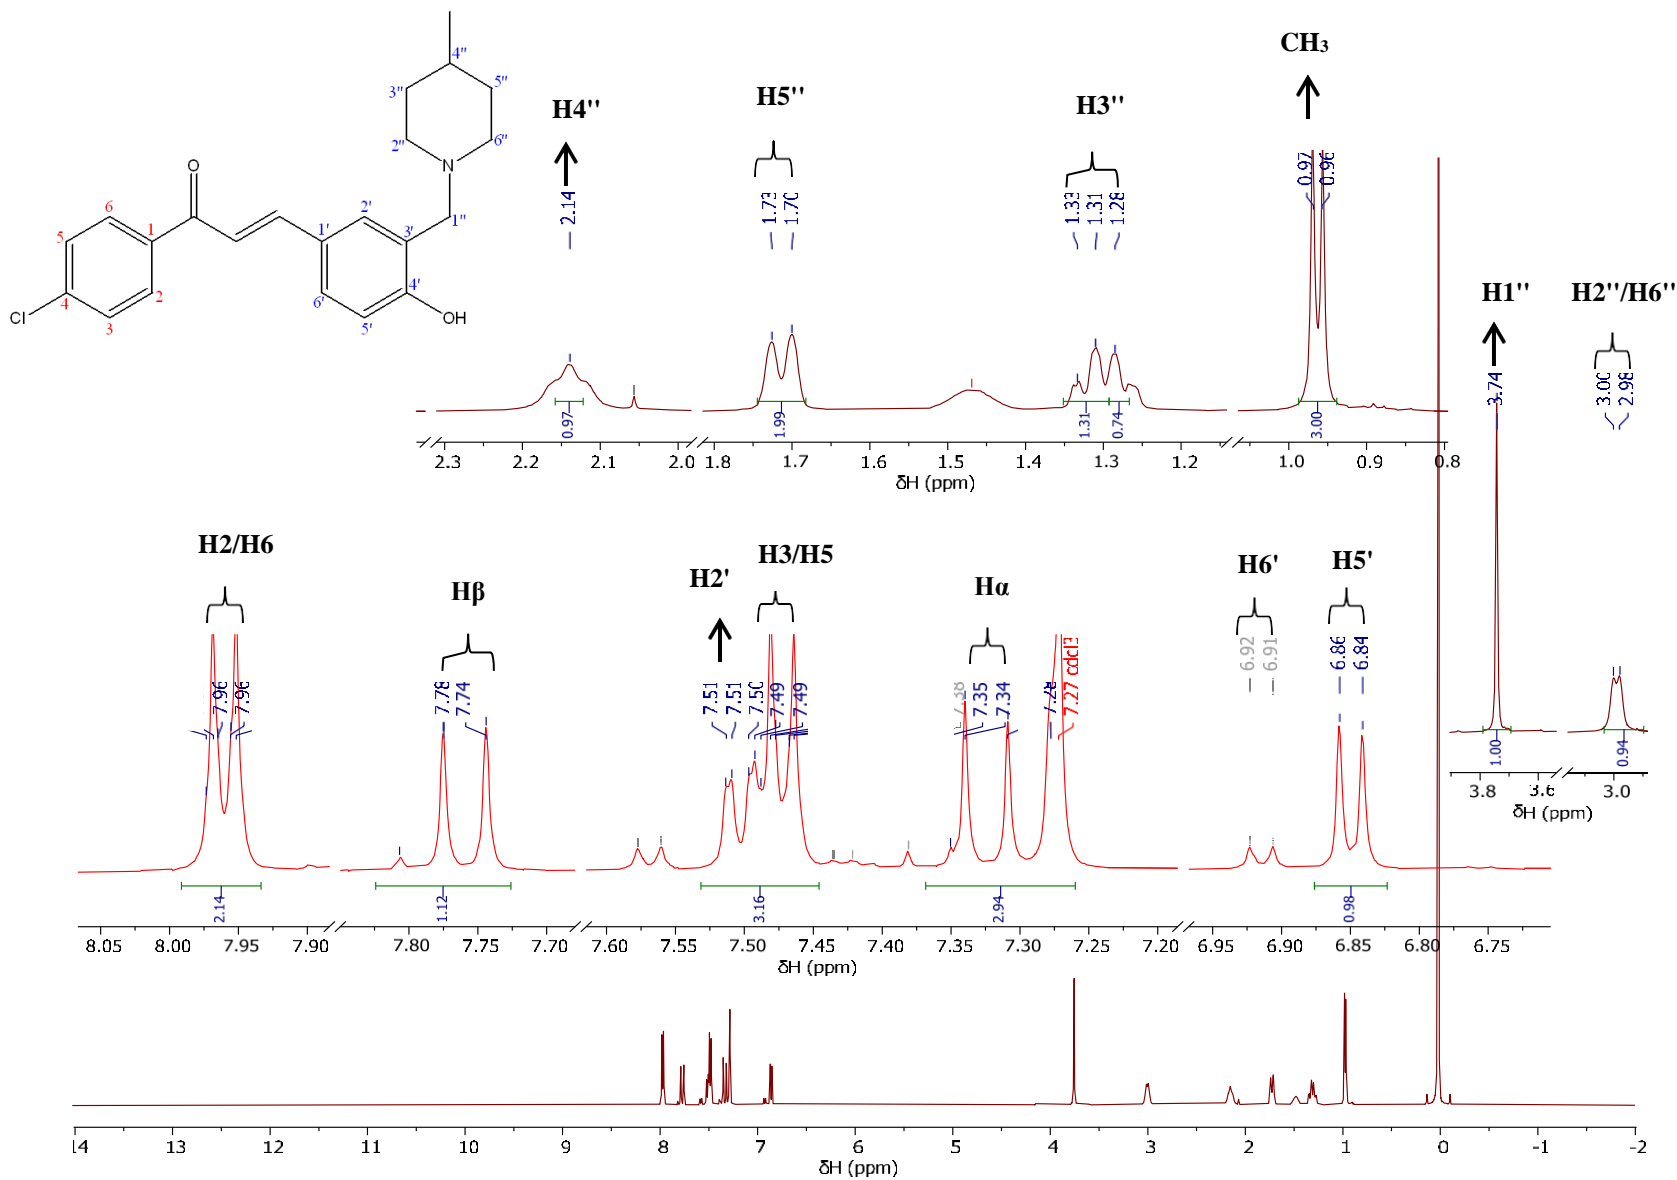

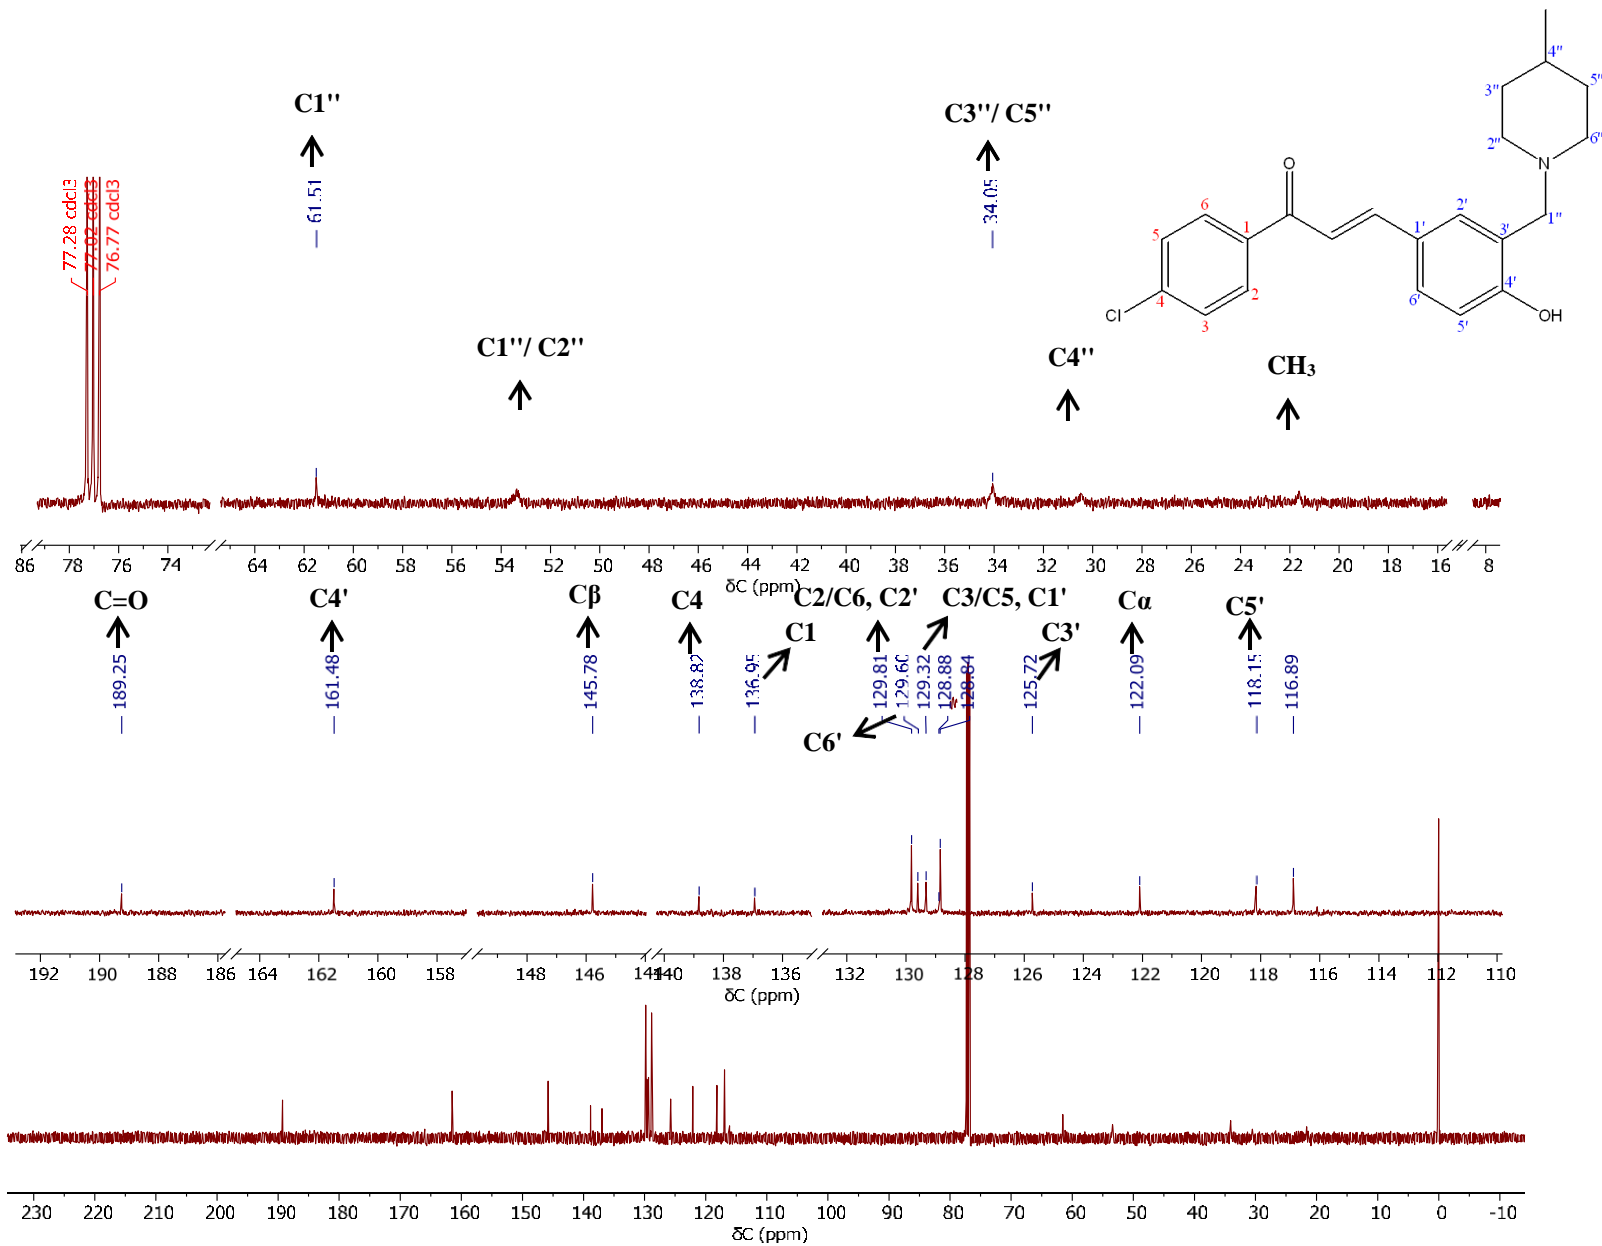

11.  $^1\text{H}$ NMR and  $^{13}\text{C}$ NMR (*E*)-1-(4-chlorophenyl)-3-(3-hydroxy-4-(4-methylpiperidin-1-yl)methyl)phenyl)prop-2-en-1-one (**2g**)

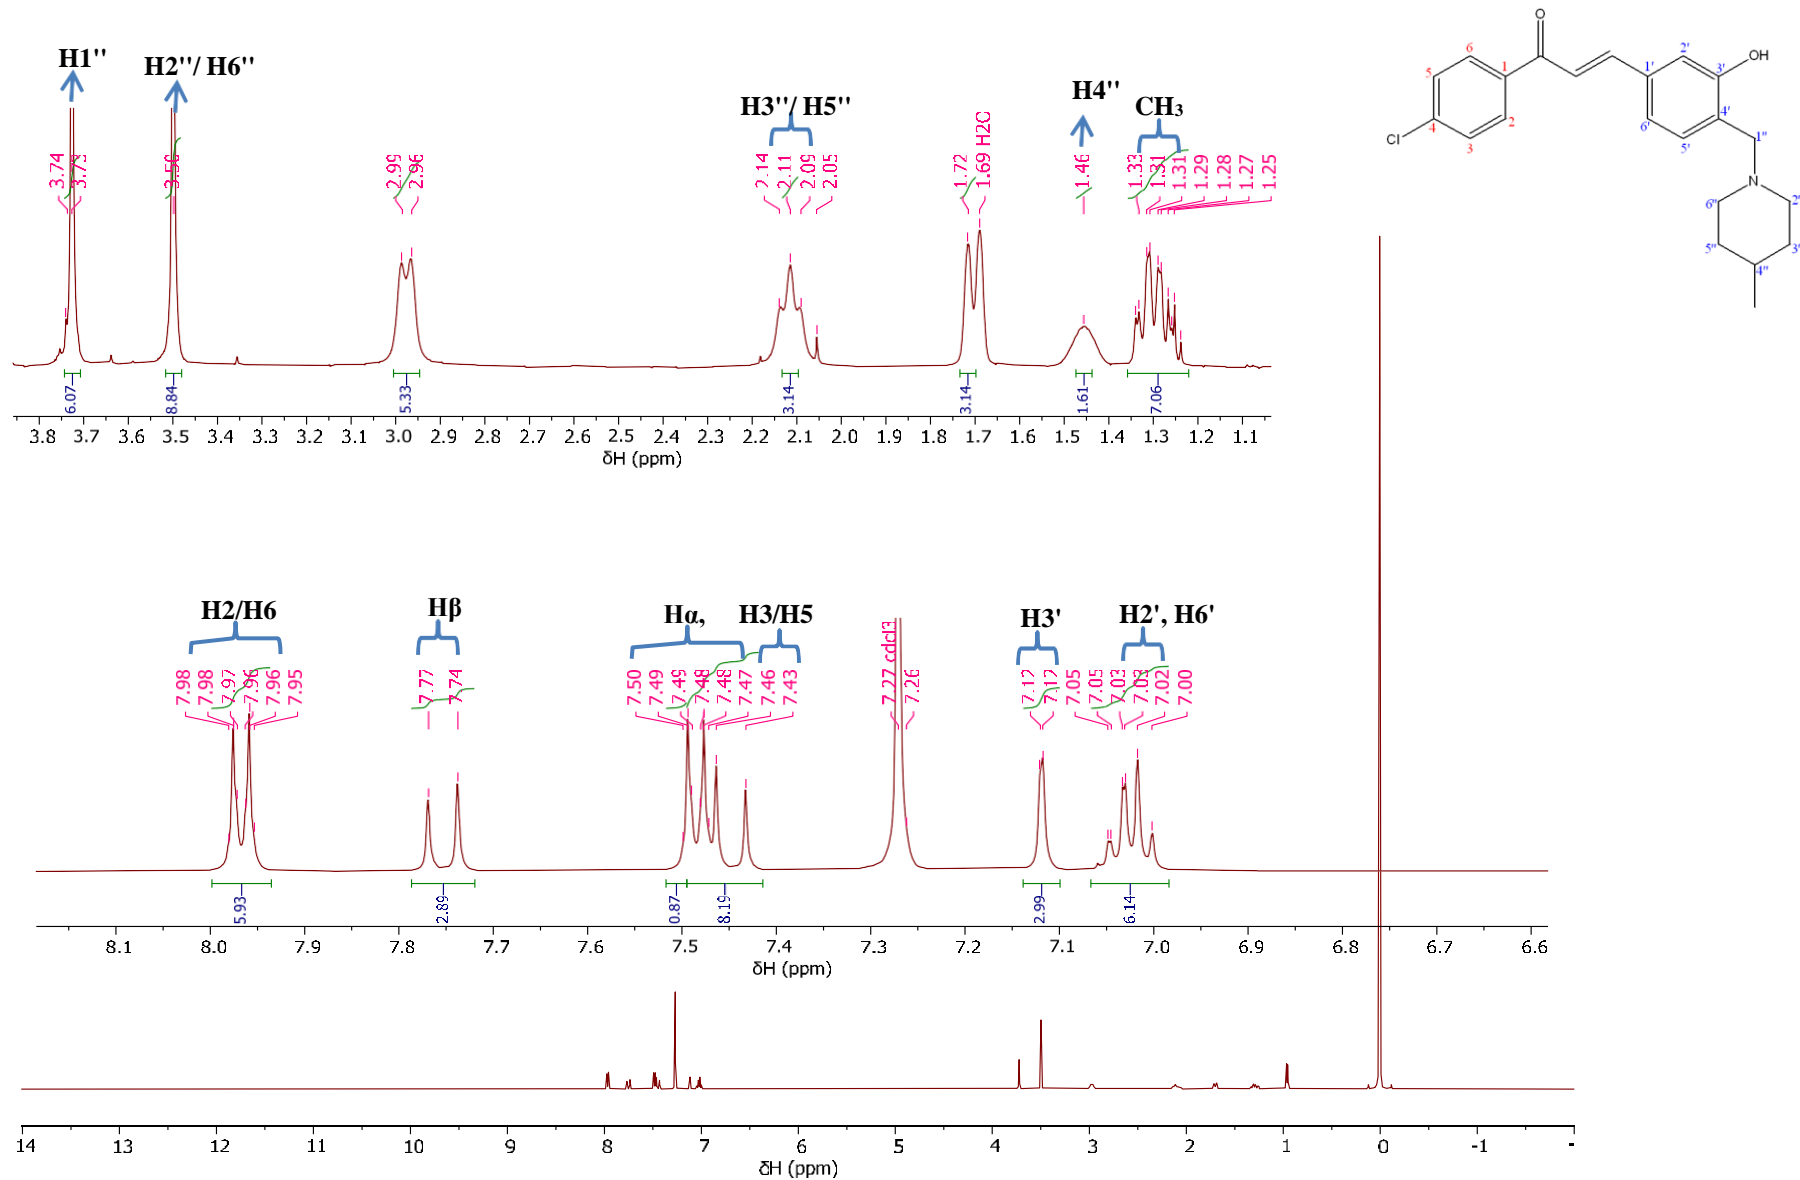

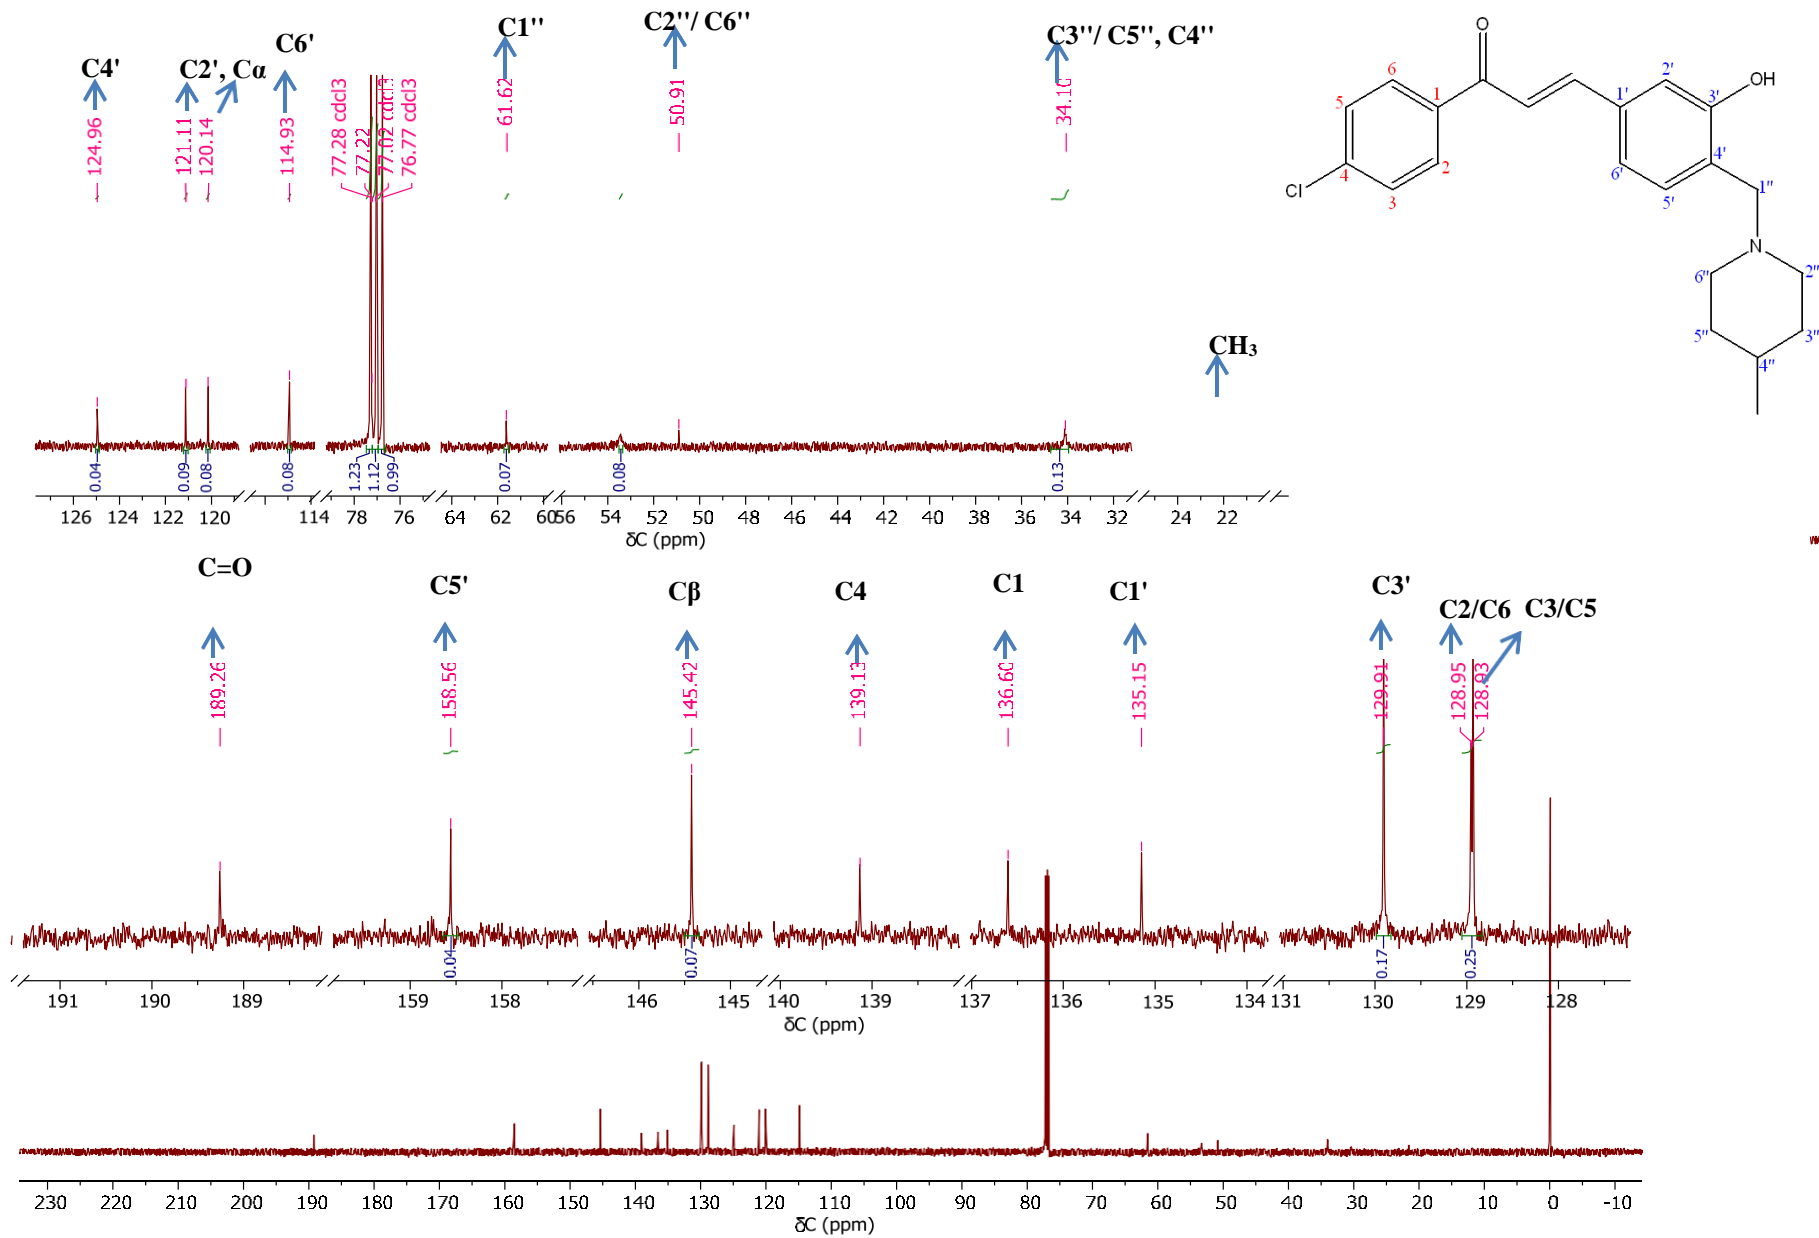

S13: CDCl<sub>3</sub>, <sup>1</sup>H and <sup>13</sup>C NMR Spectra of compound (*E*)-1-(4-bromophenyl)-3-(3-hydroxy-4-(piperidin-1-ylmethyl)phenyl)prop-2-en-1-one (**2h**)

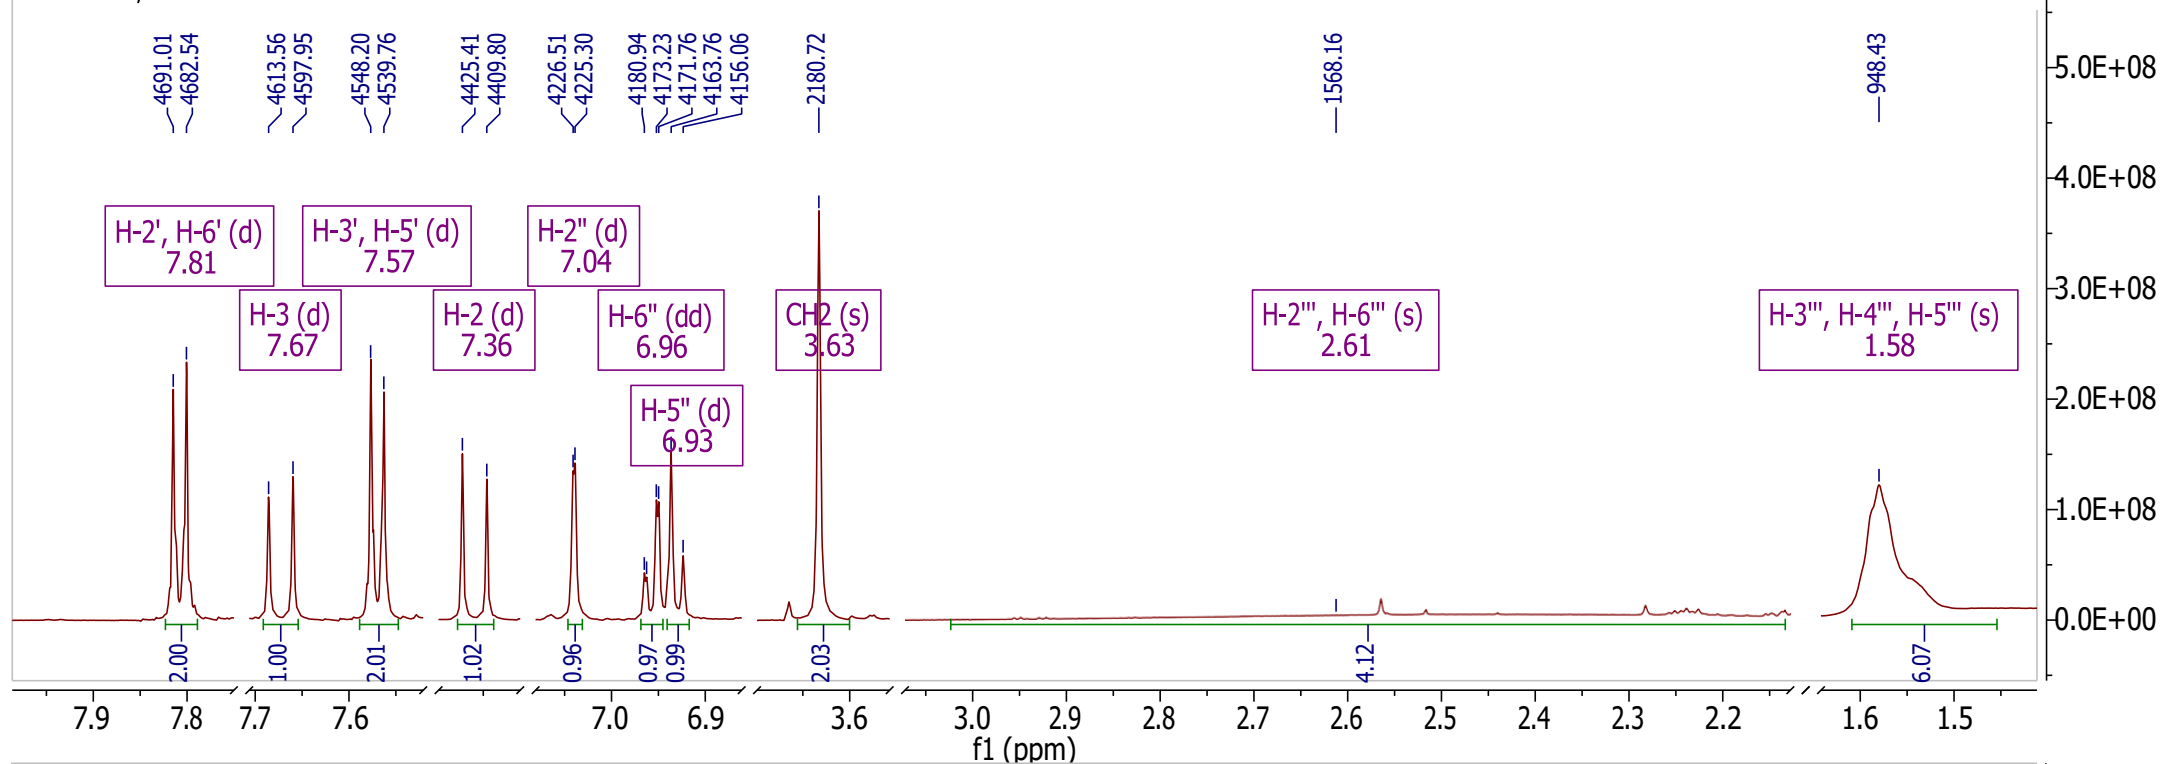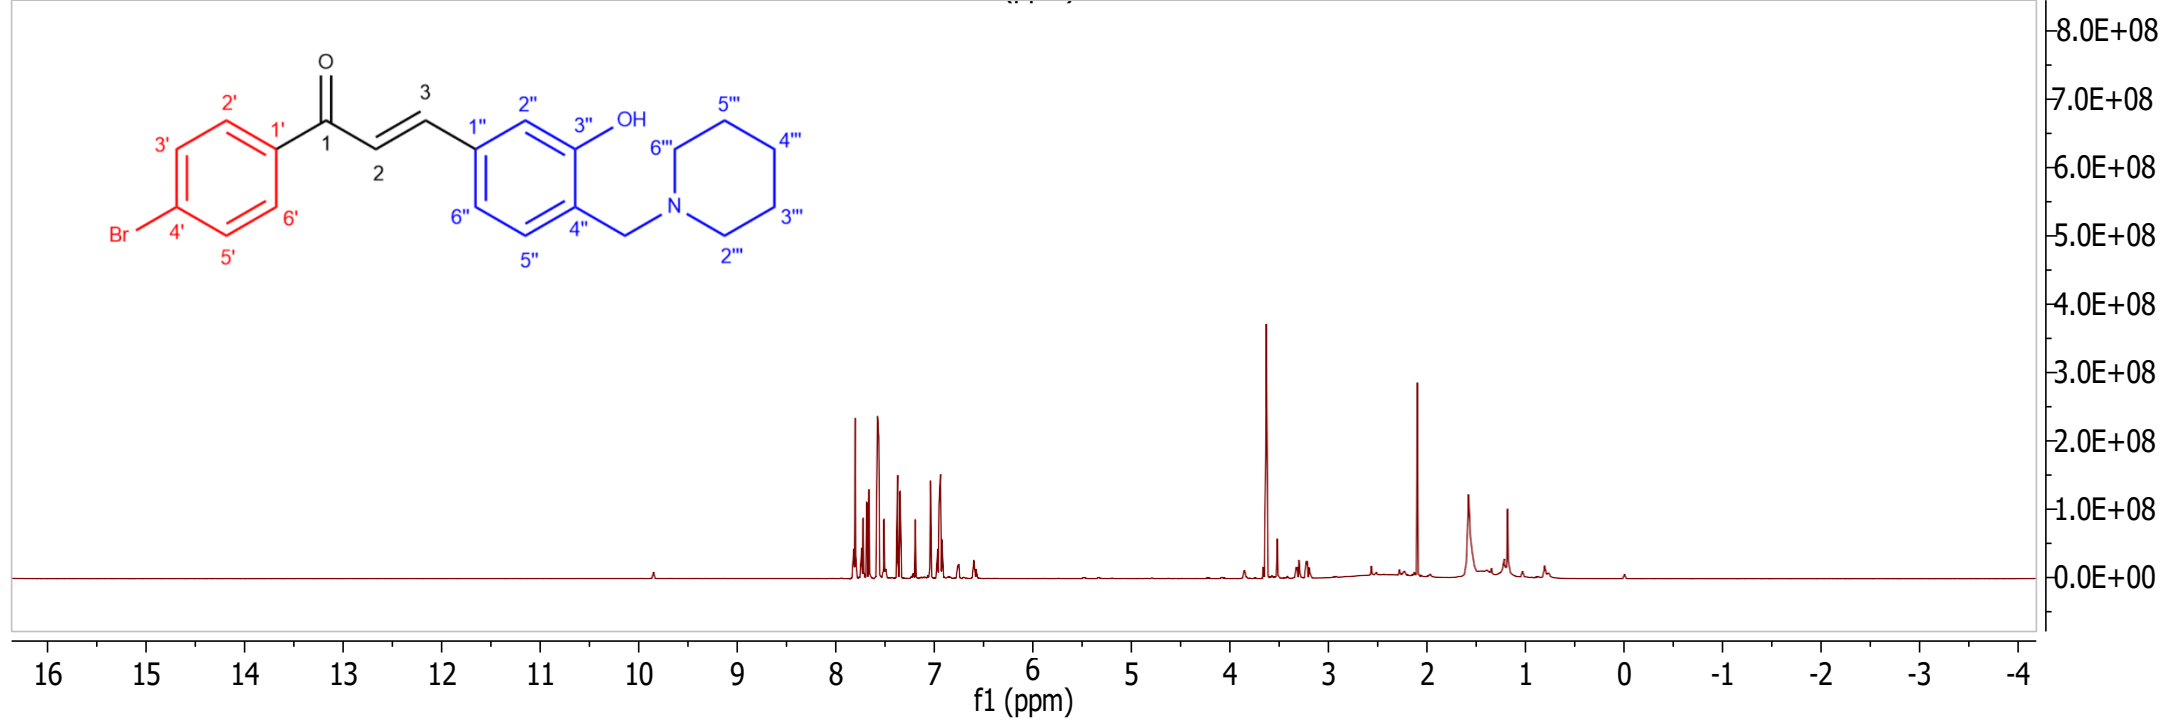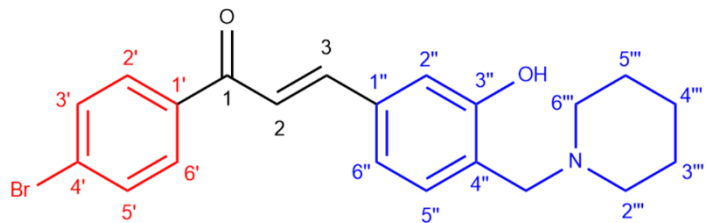

S13: CDC13, 13C

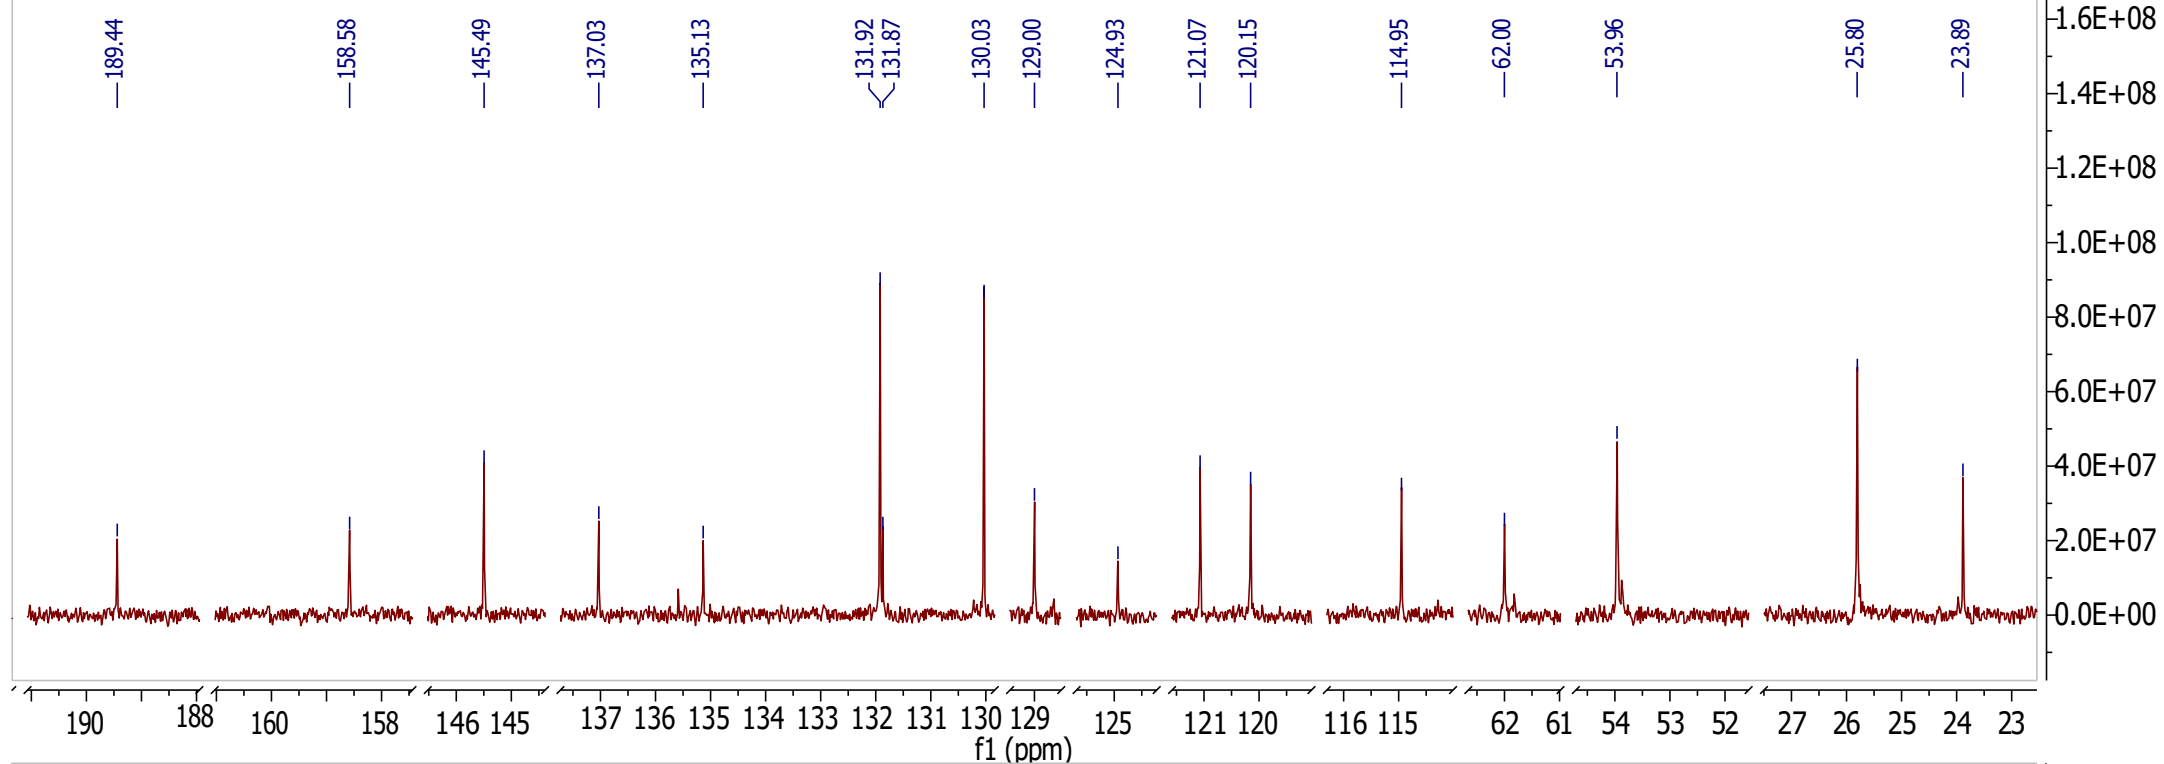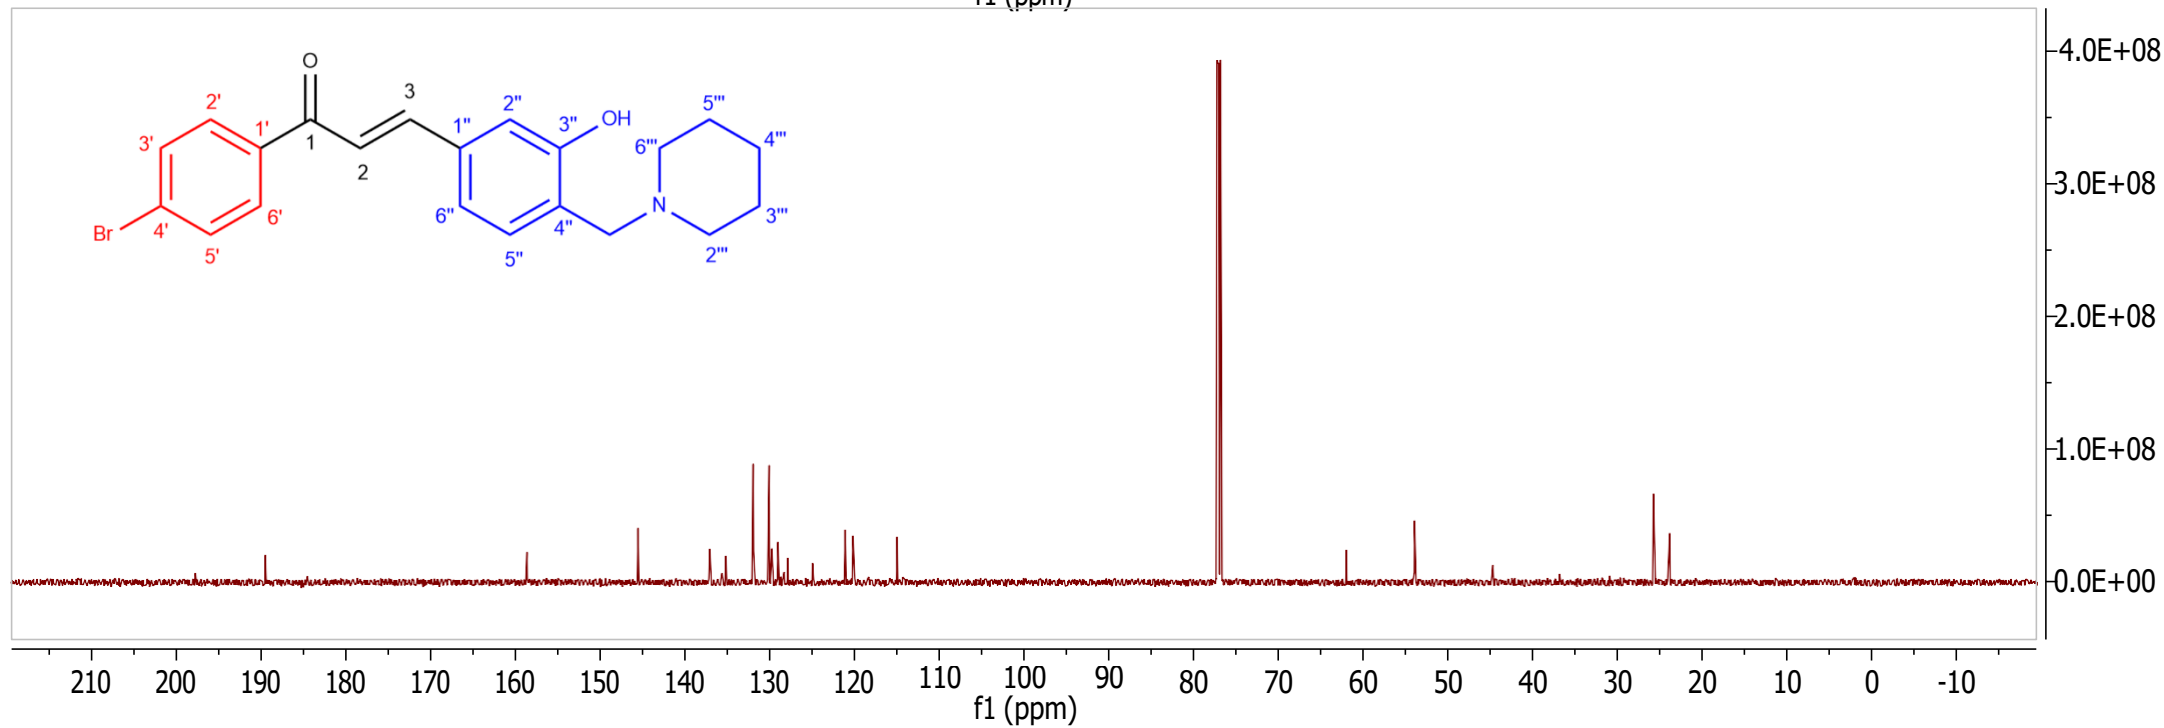

Supplement: d3ra05361j1.pdf [file d3ra05361j1.pdf]
